# Supplementary material for: Global profiling of co- and post-translationally N-myristoylated proteomes in human cells
Source: PubMed Central journal article supplement (PMC4200515; doi:10.1038/ncomms5919), 2014-09-26
Supplement: ncomms5919-s1.pdf [file ncomms5919-s1.pdf]

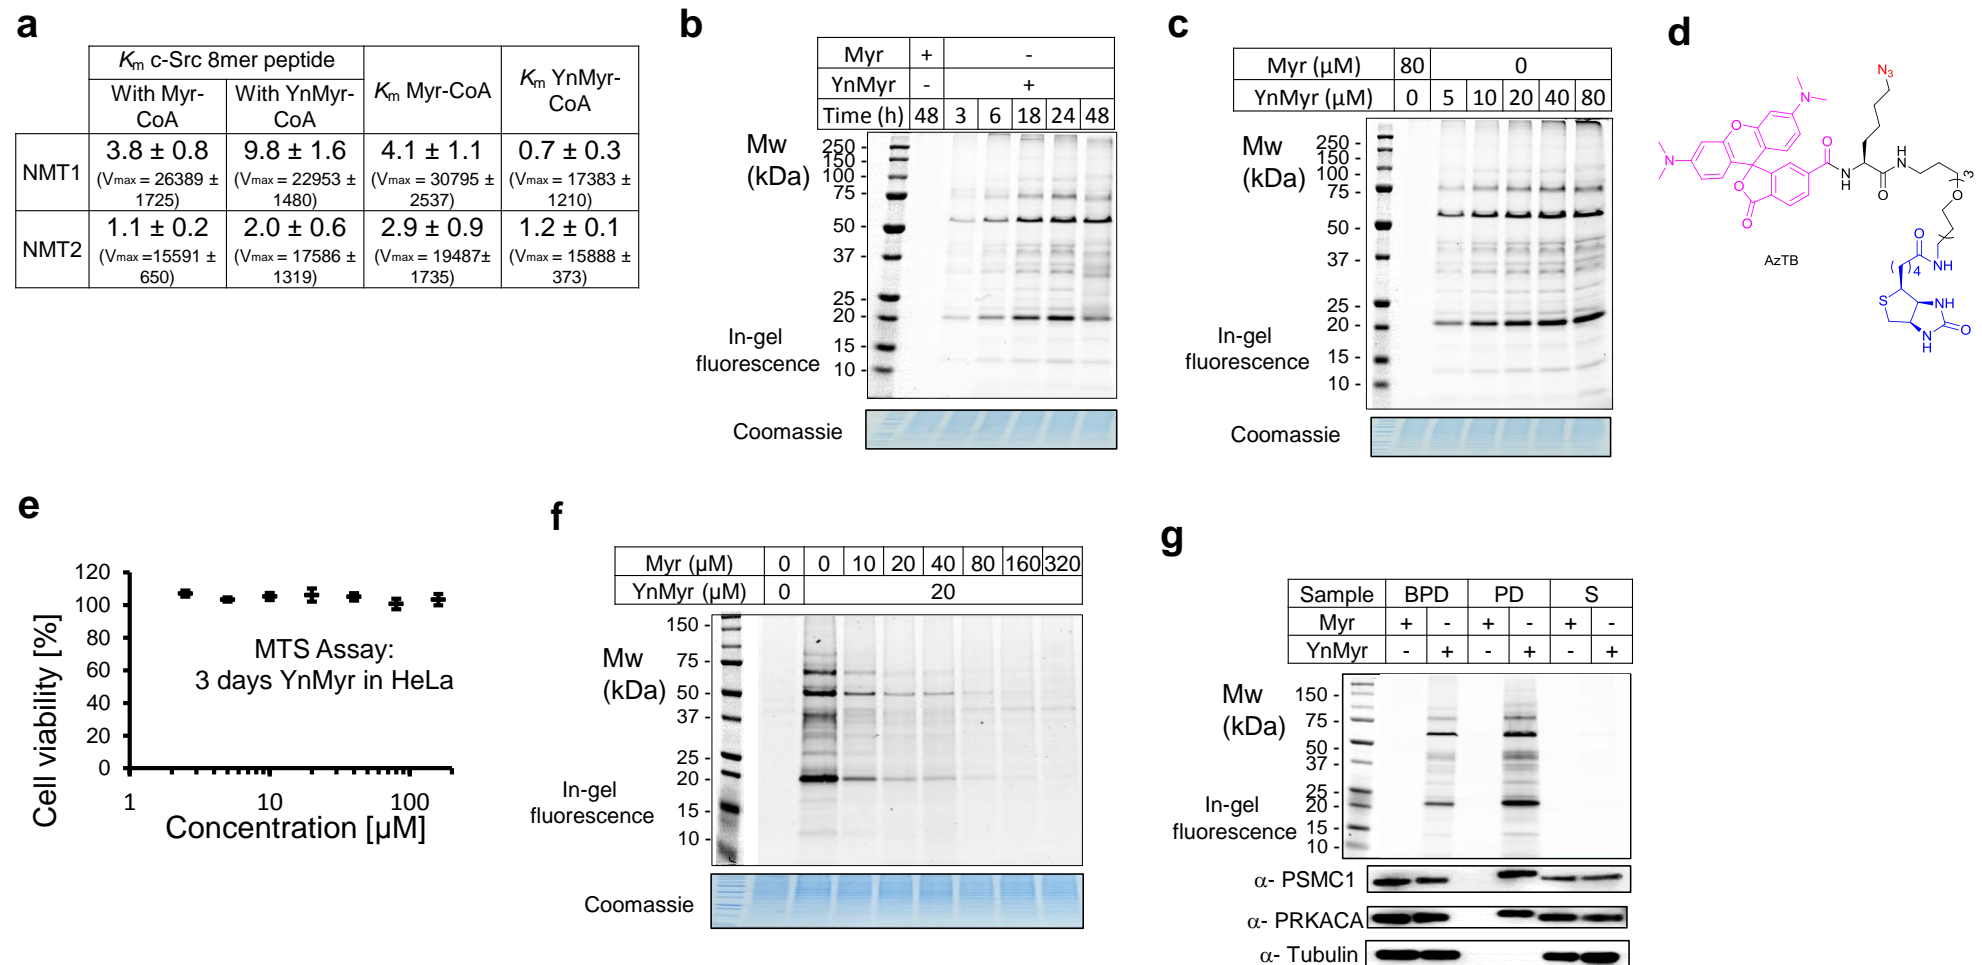

**Supplementary Figure 1: YnMyr labeling in mammalian cells.** a)  $K_m$  of 8AA N-terminal c-SRC was determined in the presence of NMT1 or NMT2 and in the presence of Myr-CoA or YnMyr-CoA using a fluorogenic assay<sup>1</sup>. The data was fitted to the Michaelis–Menten equation using GraFit (7.0). The  $K_m$  of Myr-CoA and YnMyr-CoA were also determined in presence of 8AA N-terminal c-Src and NMT1/2; errors, s.e.m. ( $n= 3$ ) b) Time-course labeling with YnMyr (20  $\mu$ M) in HeLa. c) Concentration series of YnMyr in HeLa. Cells were labeled for 24 h. d) Structure of the capture reagent AzTB (azido-tamra-biotin)<sup>2</sup>. e) Cell viability assay (MTS assay (Promega)) for 72 h in HeLa cells treated with increasing amount of YnMyr; errors s.d. ( $n = 3$ ). f) Competition experiment: YnMyr was shown to compete with the natural lipid substrate (Myr). g) Samples were analyzed by in-gel fluorescence (top) or enriched by pull-down on streptavidin beads and analyzed by Western blot (WB; bottom). The sample before pull-down (BPD), pull-down sample (PD) and the supernatant from the pull-down (S) were analyzed. PSMC1 and PRKACA were enriched in the pull-down samples. Tubulin: loading control.

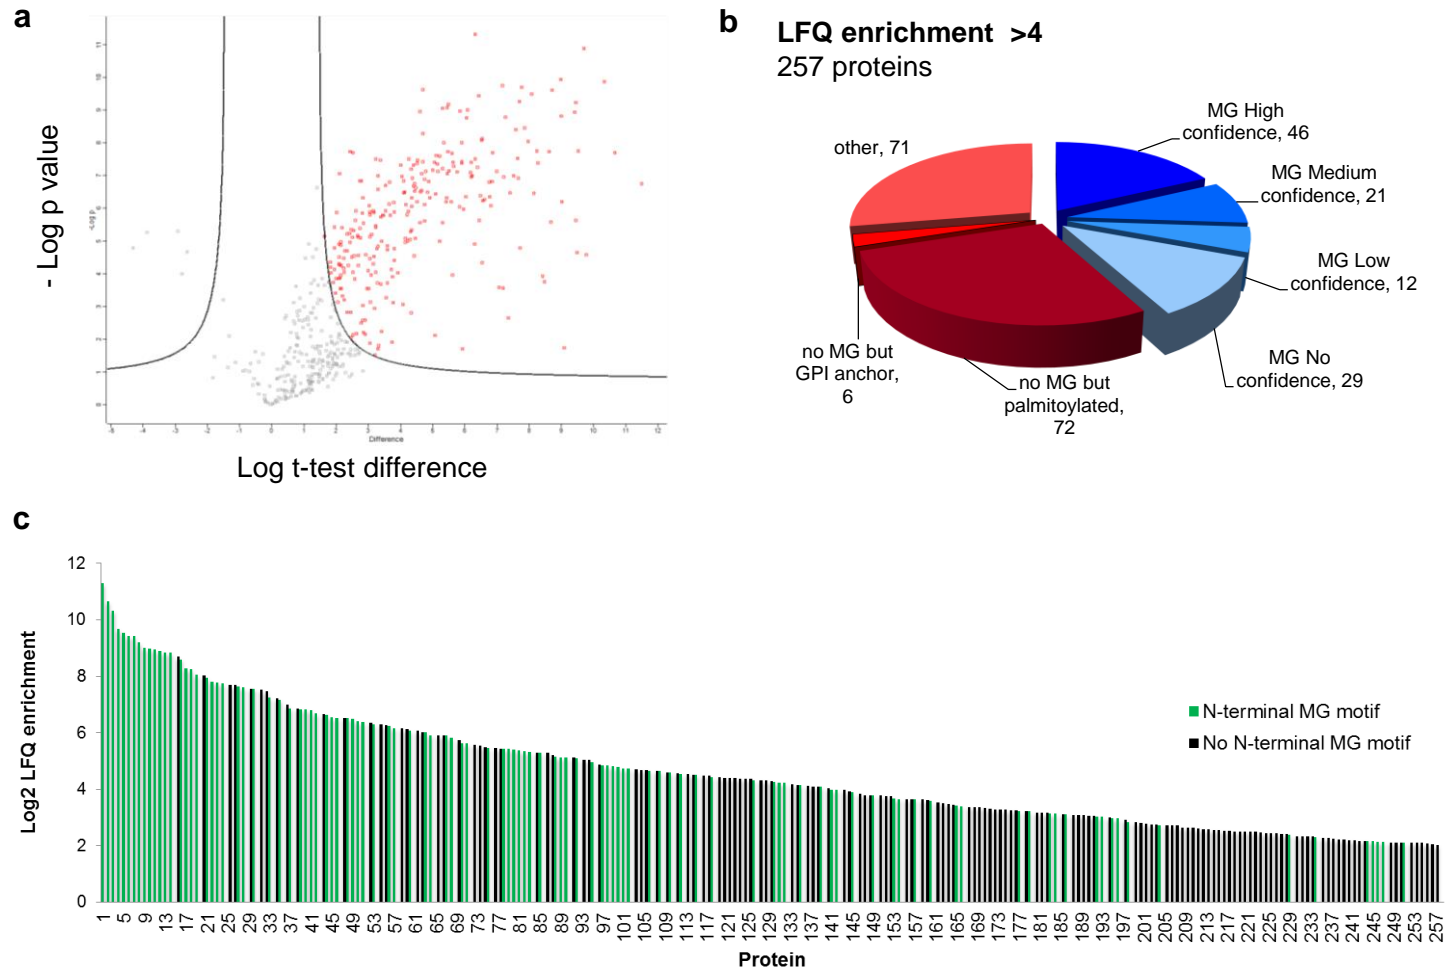

**Supplementary Figure 2: Label-free quantification (LFQ) of enrichment of YnMyr-labeled proteins in mammalian cells.** a) Two-sample test. To select the significantly enriched proteins in the YnMyr biological replicates ( $n=4$ ), a two-sample test was carried out in Perseus (modified t-test (permutation-based FDR)) using the following criteria: 250 permutations; FDR 0.001;  $S_0 = 1$ . The  $-\log p$  value was plotted against the difference of mean of the Myr biological replicates ( $n=4$ ) and YnMyr biological replicates ( $n=4$ ) ( $\log_2$  values). The proteins shown in red were significantly enriched in the YnMyr samples. b) 257 substrates were identified by label-free quantification (LFQ) in HeLa cells. 108 proteins had an N-terminal MG motif, as required for *N*-myristoylation. Prediction of *N*-myristoylation was done by two online bioinformatic tools (the MYR predictor and the Myristoylator). Some proteins with no N-terminal MG motif are known to be palmitoylated or incorporate a GPI anchor. c)  $\log_2$  LFQ enrichment was plotted for each protein significantly enriched in the YnMyr samples. Proteins shown in green have an N-terminal MG motif and proteins shown in black do not have an N-terminal MG motif.

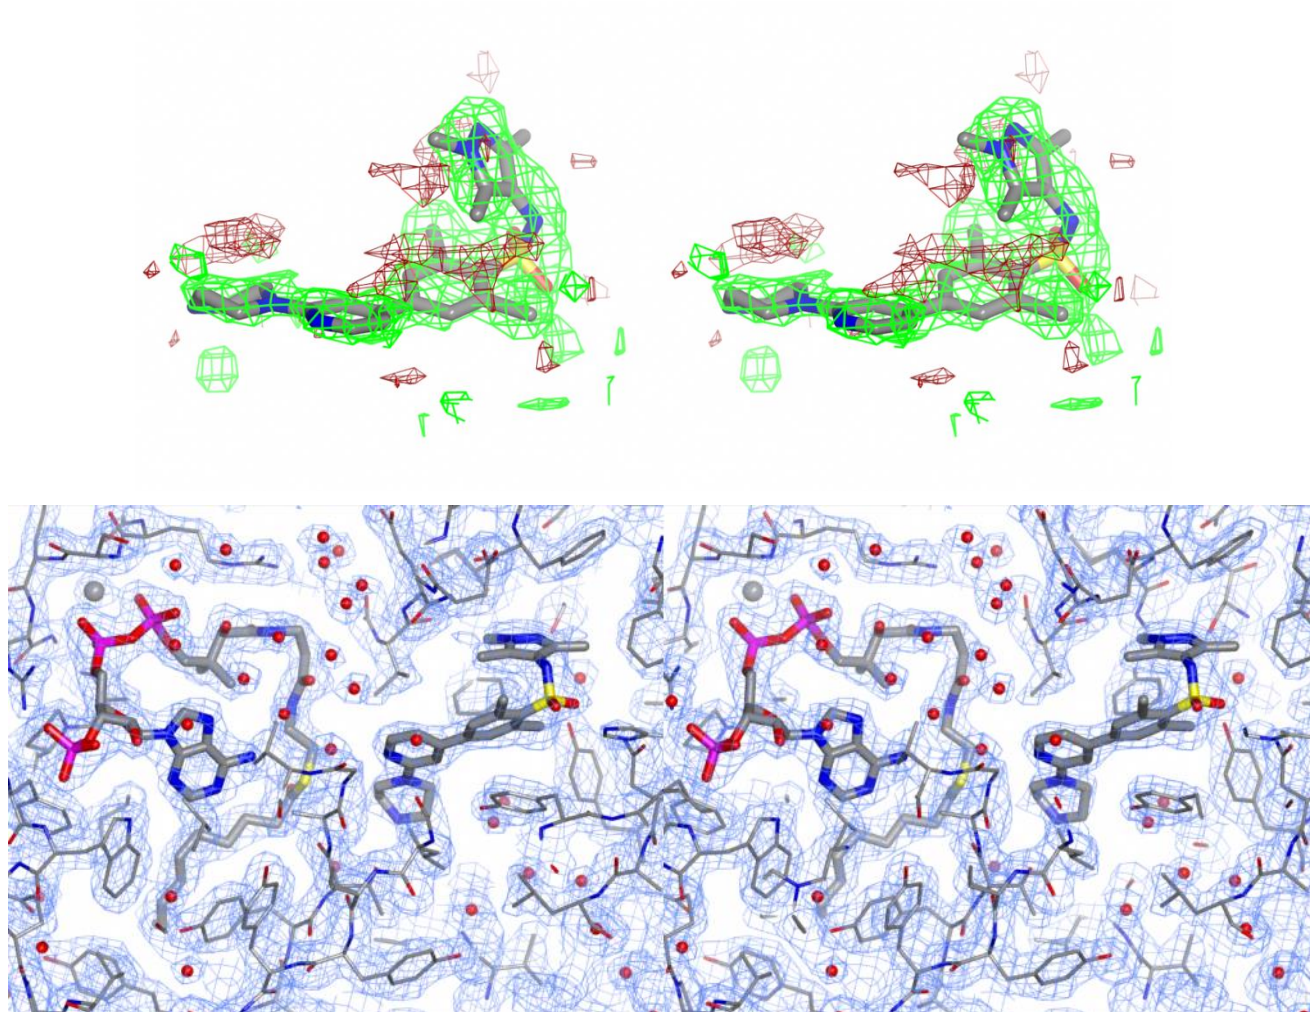

**Supplementary Figure 3: Crystal structure of inhibitor 1 bound to HsNMT1.** **Top panel:** Stereo view of initial electron density maps calculated at preliminary stages of refinement (in the absence of ligand) contoured at  $2.5\sigma$  reveal regions of positive (green) and negative (red) density in the difference map ( $mF_o-dF_c$ ). The ligand is shown in thick cylinder representation, coloured by atom; carbon (gray), oxygen (red), nitrogen (blue), sulphur (yellow) and chlorine (silver). **Lower panel:** Stereo view of the final, refined electron density map ( $2mF_o-dF_c$ ) contoured at a level of  $1\sigma$ . The inhibitor and myristoyl-CoA is shown in thick cylinder representation, protein in thin cylinder and colored by atom, as above. The red spheres represent water molecules and the grey sphere represents a Mg atom.

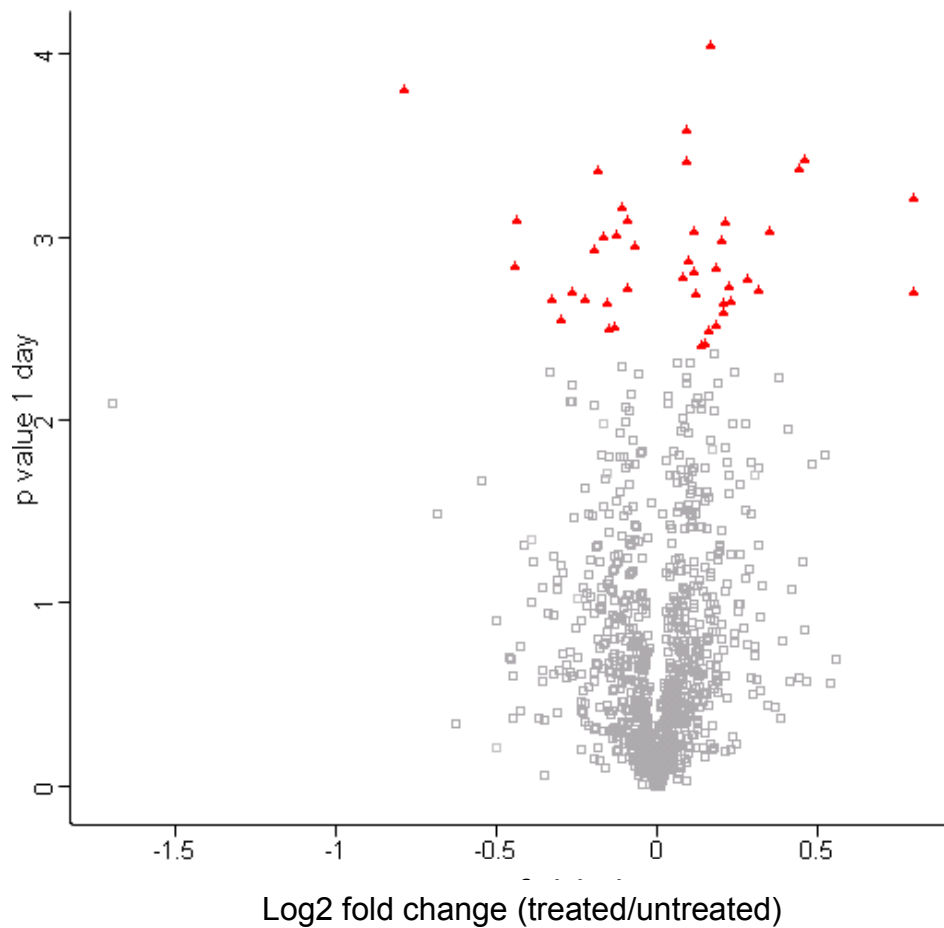

**Supplementary Figure 4: quantitative analysis of whole proteome protein abundance following treatment with 1.** The HeLa proteome was analyzed by ‘spike-in’ SILAC (see main text) following 24 hours treatment with 5  $\mu$ M 1 relative to an untreated control. 1069 proteins were quantified with high confidence and fold change calculated in Perseus. Proteins with a statistically significant change in abundance are highlighted in red; see supplementary methods for experimental details and **Supplementary Data 5** for full dataset.

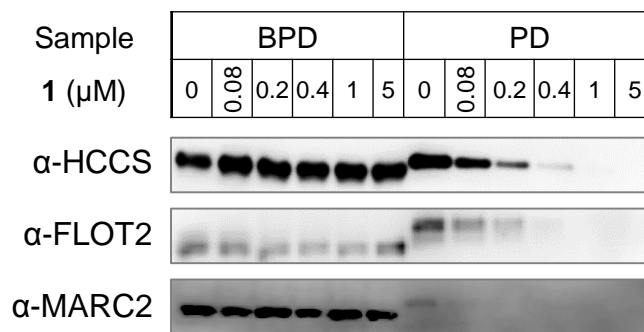

**Supplementary Figure 5: Western blot analysis of novel NMT substrates.** Proteins were analyzed by Western blot under the same conditions as in Fig. 2d (see main text). Proteins show a band shift to a higher apparent molecular weight on labeling consistent with their modification by CuAAC.

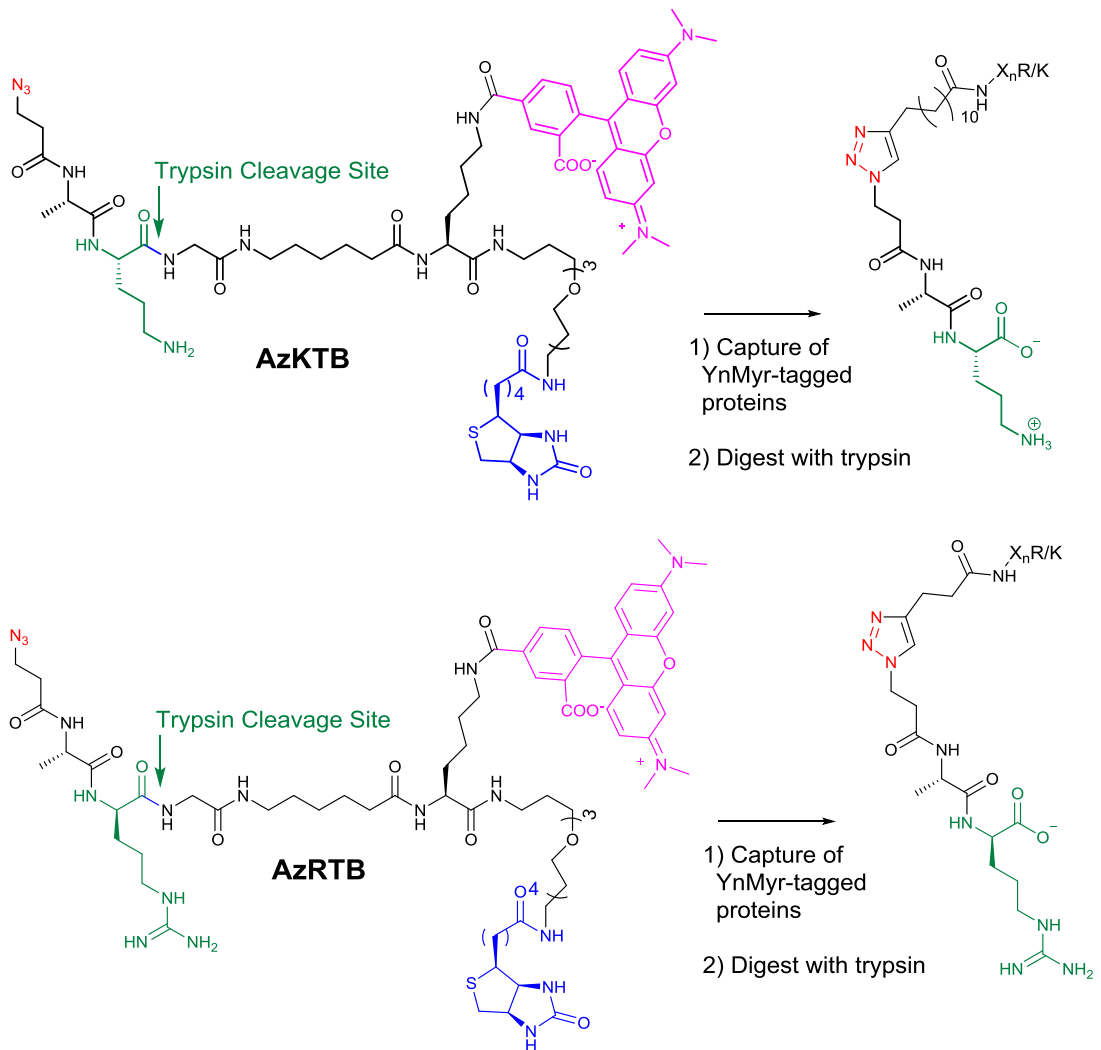

**Supplementary Figure 6: Generation of a tagged solution-phase peptide through on-bead tryptic digest using a) AzKTb or b) AzRTb.** X represents any amino acid except R and K, and n is the number of amino acid in the sequence ( $n > 6$  as the the minimum peptide length allowed for the MaxQuant search was seven amino acids)

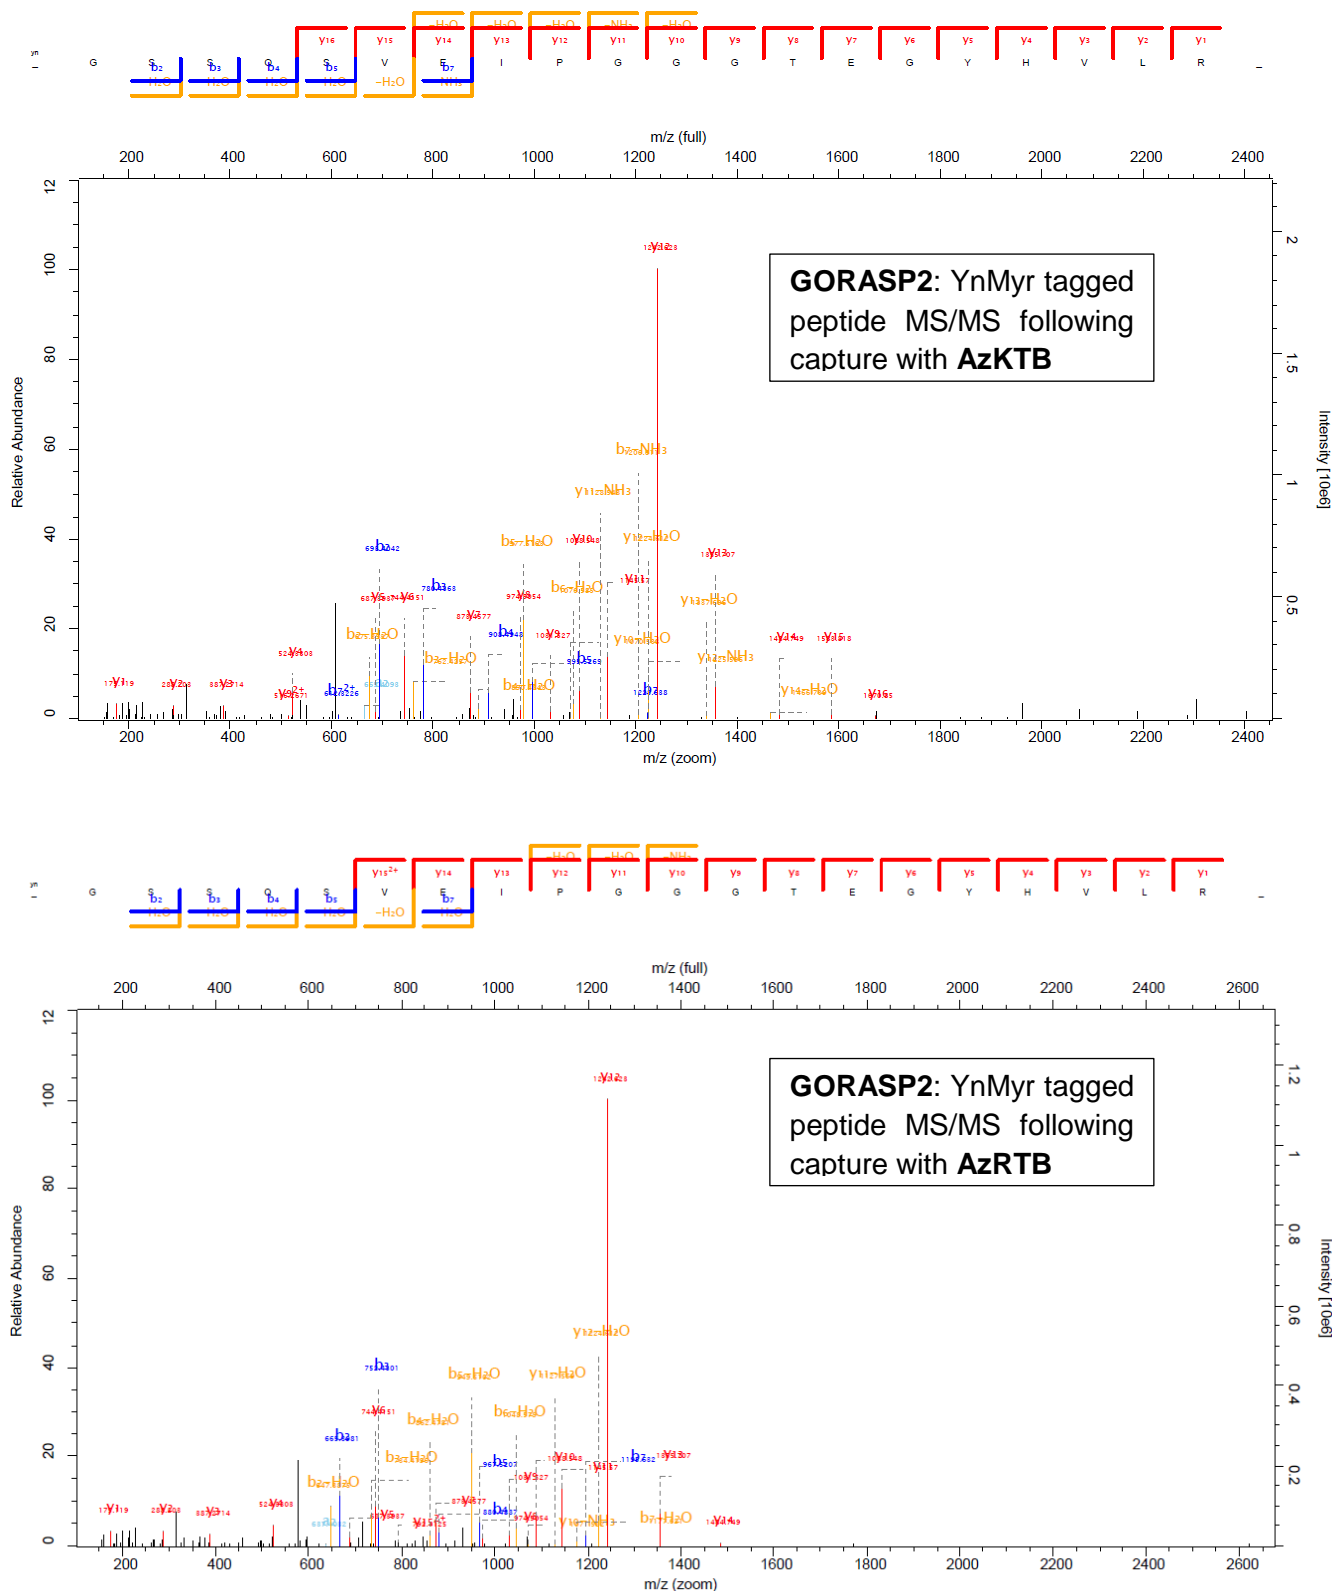

**Supplementary Figure 7: Example of an MS/MS spectrum resulting from YnMyr tagging of the N-terminus of a co-translational NMT substrate.** MS/MS spectra for the N-terminal YnMyr-tagged tryptic peptide derived from Golgi reassembly-stacking protein 2 (GORASP2) captured with **AzKTB** (top) or **AzRTB** (bottom). N-terminal tryptic peptide sequence is GSSQSVEIPGGGTEGYHVLRL. Spectra were extracted from standard whole-proteome chemical proteomic analyses using **YnMyr** tagging of HeLa cells, ligation of proteins (CuAAC) to the appropriate capture reagent, affinity enrichment, on-bead digest and nanoLC-MS/MS analysis.

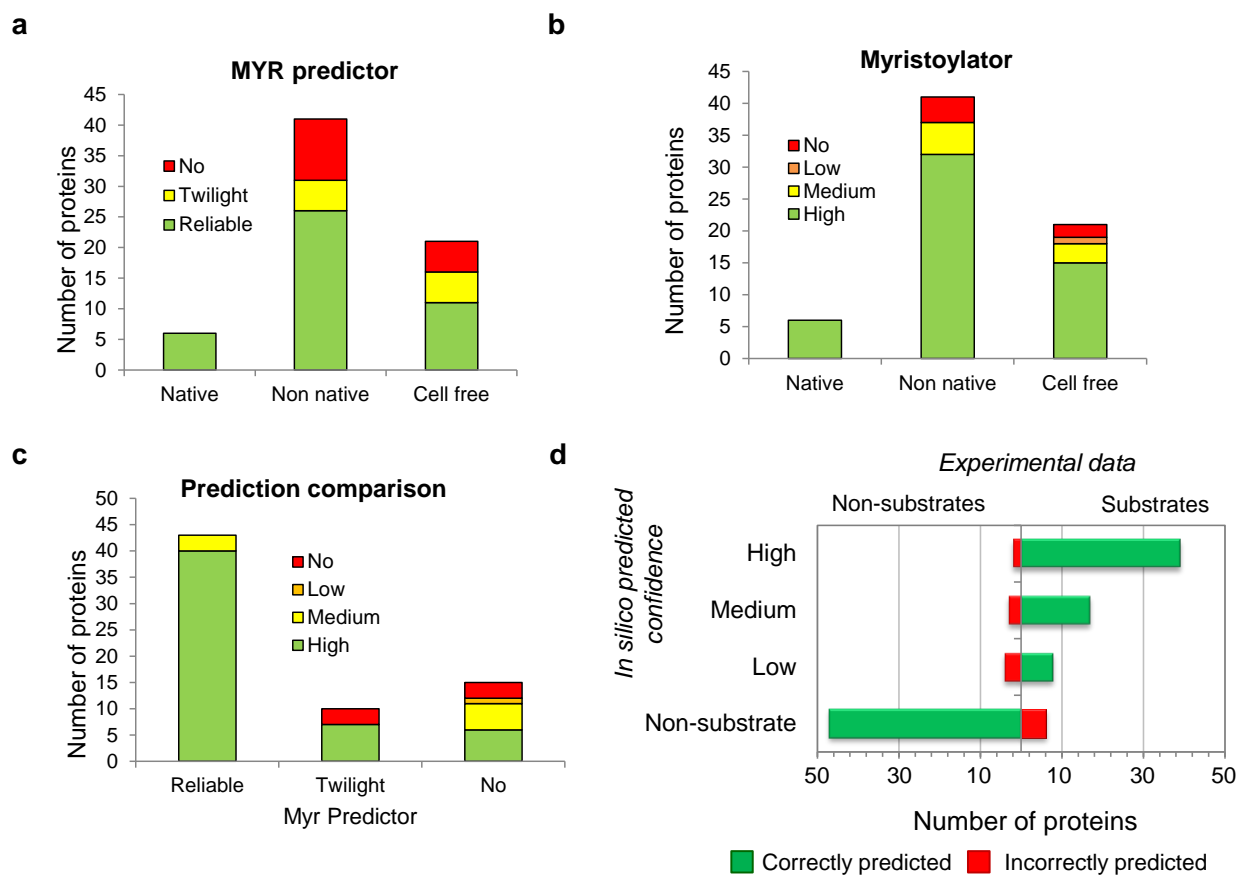

**Supplementary Figure 8: Prediction of *N*-myristoylation for known NMT substrates (see Supplementary Table 1).** Predictions by a) 'MYR predictor' or b) 'Myristoylator' are shown for proteins identified prior to the present study at native or non-native levels, or in a cell-free system (see Supplementary Table 1). 15 and 6 of these proteins could not be correctly predicted as NMT substrates by the MYR predictor and Myristoylator, respectively. c) The predictions were compared between predictors. 40 proteins predicted as reliable by MYR predictor were also predicted with the highest confidence by Myristoylator. 3 proteins were predicted not to be *N*-myristoylated by both predictors. The predictors disagree on more than 25 predictions. Low and medium predictions made by Myristoylator were considered to be equivalent to twilight prediction by MYR predictor. d) Proportion of bioinformatic predictions (high-medium-low confidence substrates, and non-substrates) validated experimentally in the present study (green) against proportion predicted incorrectly (red).



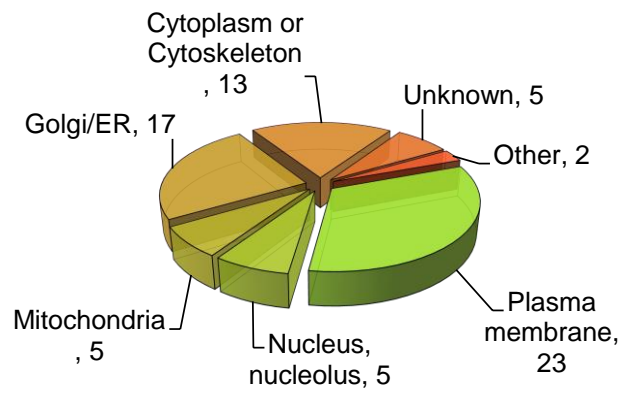

**Supplementary Figure 9: Cellular localization for 70 NMT substrates identified in this study (Gene Ontology annotations).**

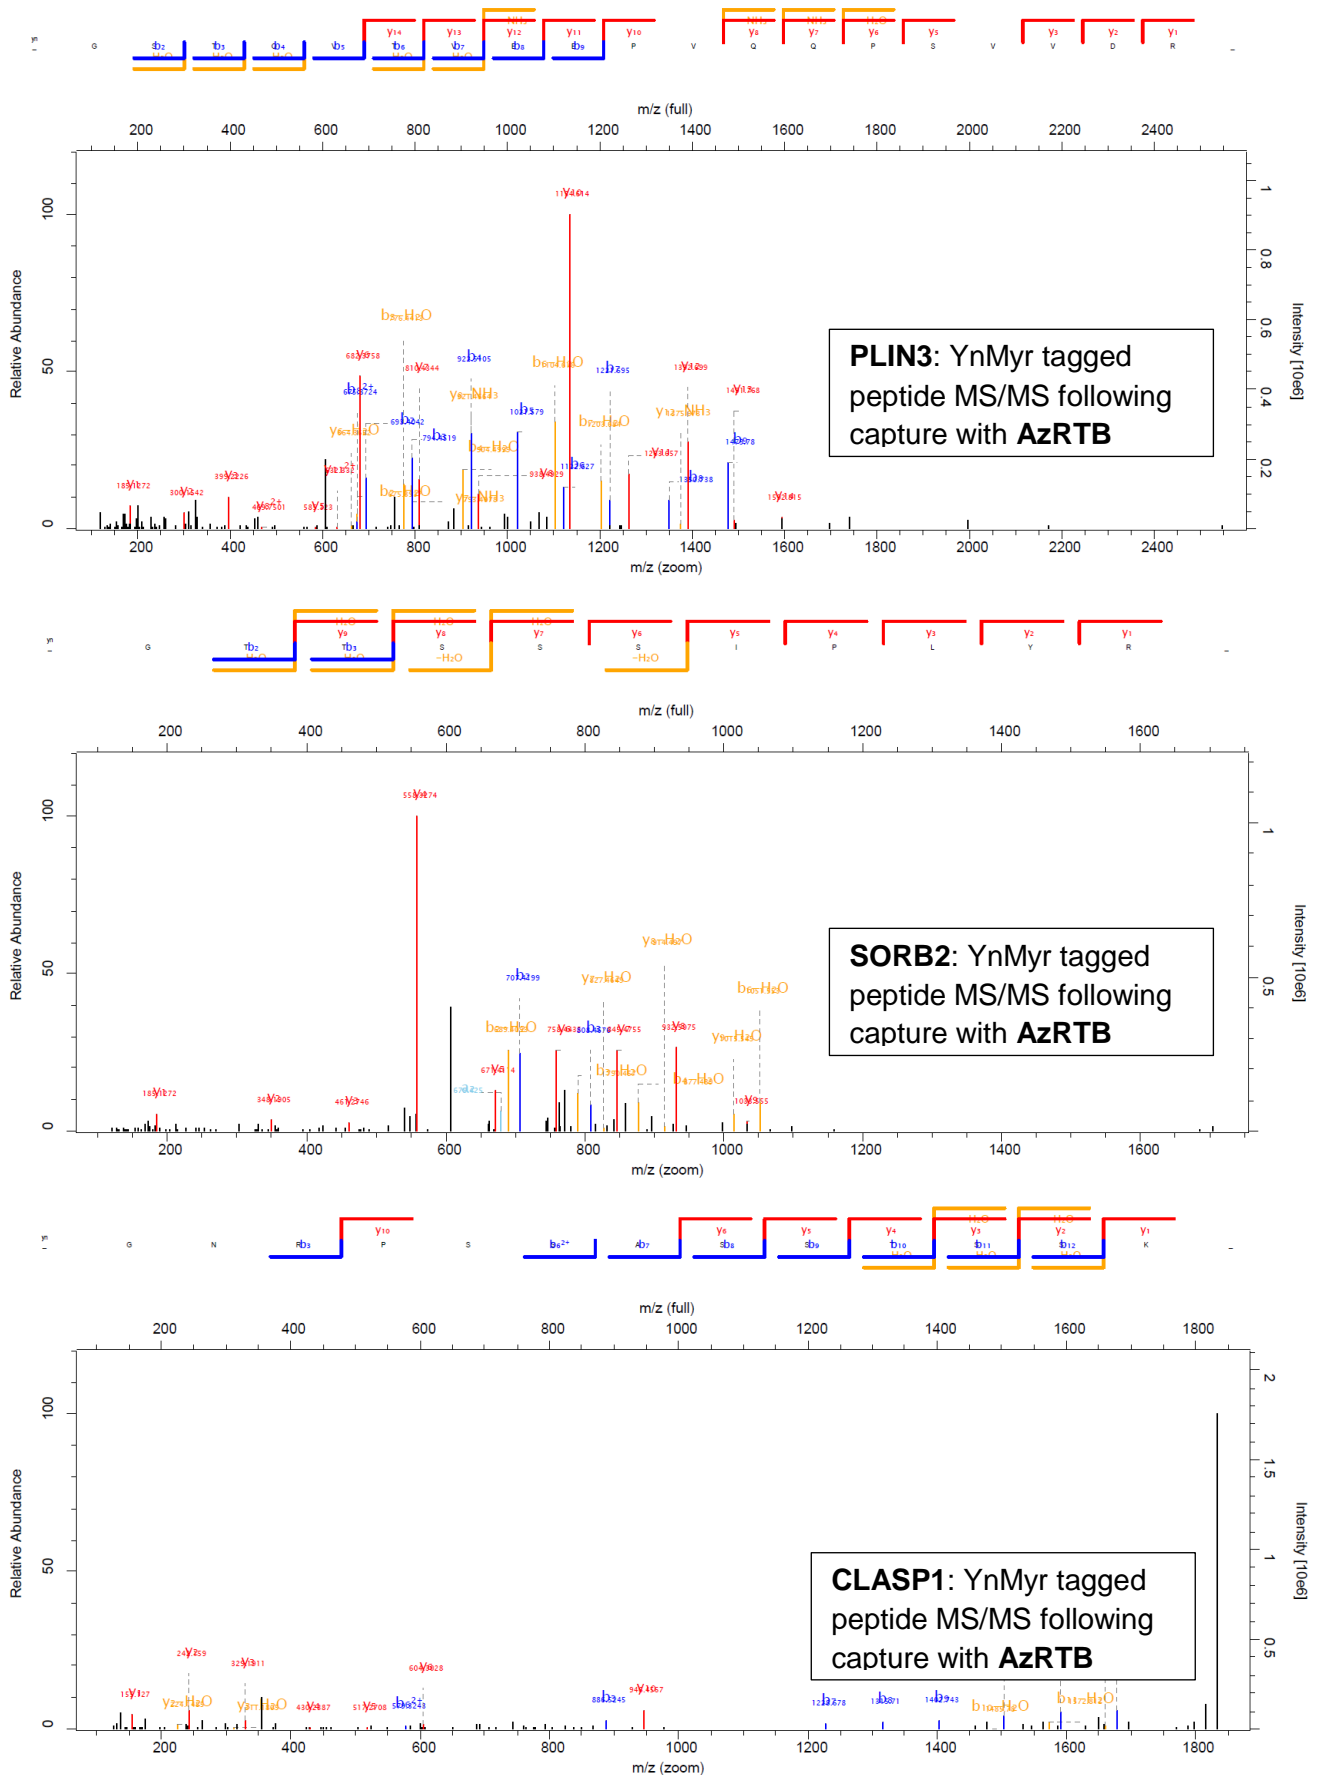

**Supplementary Figure 10: Example of MS/MS spectrum from YnMyr tagging of the N-terminus of post-translational NMT substrates.** MS/MS spectra for the N-terminal YnMyr-tagged tryptic peptide derived from Perilipin-3 (PLIN3), Sorbin and SH3 domain-containing protein 2 (SORB2) and CLIP-associating protein 1 (CLASP1), labeled with AzRTB as described in Supplementary Fig. 7.

|       |        |
|-------|--------|
| ADCY9 | O60503 |
|-------|--------|

| 10         | 20          | 30         | 40          | 50         | 60         |
|------------|-------------|------------|-------------|------------|------------|
| MASPPHQQLL | HHHSTEVSCD  | SSGDSNSVRV | KINPKQLSSN  | SHPKHCKYSI | SSSCSSSGDS |
| 70         | 80          | 90         | 100         | 110        | 120        |
| GGVPRRVGGG | GRLRRQKKLP  | QLFERASSRW | WDPKFDSVNL  | EEACLERCFF | QTQRRFRYAL |
| 130        | 140         | 150        | 160         | 170        | 180        |
| FYIGFACLWL | SIYFAVHMRS  | RLIVMVAPAL | CFLLLVCVGGF | LFTFTKLYAR | HYAWTSLALT |
| 190        | 200         | 210        | 220         | 230        | 240        |
| LLVFALTLAA | QFQVLTPVSG  | RGDSSNLTAT | ARPTDTCLSQ  | VGSFSMCIEV | LFLLYTMHLL |
| 250        | 260         | 270        | 280         | 290        | 300        |
| PLYLSLCLGV | AYSVLFFETFG | YHFRDEACFP | SPGAGALHWE  | LLSRGLLHGC | IHAIGVHLFV |
| 310        | 320         | 330        | 340         | 350        | 360        |
| MSQVRSRSTF | LKVGQSIMHG  | KDLEVEKALK | ERMIHVSMPR  | IIADDLMKQG | DEESENSVKK |
| 370        | 380         | 390        | 400         | 410        | 420        |
| HATSSPKNRK | KKSSIQKAPI  | AFRPFKMQQI | EEVSILFADI  | VGFTKMSANK | SAHALVGLLN |
| 430        | 440         | 450        | 460         | 470        | 480        |
| DLFGRFDRLC | EETKCEKIST  | LGDCYYCVAG | CPEPRADHAY  | CCIEMGLGMI | KAIEQFCQEK |
| 490        | 500         | 510        | 520         | 530        | 540        |
| KEMVNMVRGV | HTGTVLCGIL  | GMRRFKFDVW | SNDVNLANLM  | EQLGVAGKVH | ISEATAKYLD |
| 550        | 560         | 570        | 580         | 590        | 600        |
| DRYEMEDGKV | IERLGQSVVA  | DQLKGLKTYL | ISGQRAKESR  | CSCAEALLSG | FEVIDGSOVS |
| 610        | 620         | 630        | 640         | 650        | 660        |
| SGPRGOGTAS | SGNVSDLAQT  | VKTFDNLKTC | PSCGITFAPK  | SEAGAEGGAP | QNGCQDEHKN |
| 670        | 680         | 690        | 700         | 710        | 720        |
| STKASGGPNP | KTQNGLLSPP  | QEEKLTNSQT | SLCEILQEKG  | RWAGVSLDQS | ALLPLRFKNI |
| 730        | 740         | 750        | 760         | 770        | 780        |
| REKTDAAHVD | VIKEDSLMKD  | YFFKPPINQF | SLNFLDQELE  | RSYRTSYQEE | VIKNSPVKTF |
| 790        | 800         | 810        | 820         | 830        | 840        |
| ASPTFSSLLD | VFLSTTVFLT  | LSTTCFLKYE | AATVPPPPAA  | LAVFSAALLL | EVLSLAVSIR |
| 850        | 860         | 870        | 880         | 890        | 900        |
| MVFFLEDVMA | CTKRLEWIA   | GWLPRHCIGA | ILVSLPALAV  | YSHVTSEYET | NIHFPVFTGS |
| 910        | 920         | 930        | 940         | 950        | 960        |
| AALIAVVHYC | NFCQLSSWMR  | SSLATVVGAG | PLLLLYVSLC  | PDSSVLTSPL | DAVQNFSSER |
| 970        | 980         | 990        | 1000        | 1010       | 1020       |
| NPCNSSVPRD | LRRPASLIGQ  | EVVLVFFLLL | LLVWFLNREF  | EVSYRLHYHG | DVEADLHRTK |
| 1030       | 1040        | 1050       | 1060        | 1070       | 1080       |
| IQSMRDQADW | LLRNIIPYHV  | AEQLKVSQTY | SKNHDSGGVI  | FASIVNFSEF | YEENYEGGKE |
| 1090       | 1100        | 1110       | 1120        | 1130       | 1140       |
| CYRVLNELIG | DFDELLSKPD  | YSSIEKIKTI | GATYMAASGL  | NTAQADGSH  | PQEHLQILFE |
| 1150       | 1160        | 1170       | 1180        | 1190       | 1200       |
| FAKEMMRVVD | DFNNMMLWFN  | FKLRVGFNHG | PLTAGVIGTT  | KLLYDIWGD  | VNIASRMDTT |
| 1210       | 1220        | 1230       | 1240        | 1250       | 1260       |
| GVECRIQVSE | ESYRVLSKMG  | YDFDYRGTVN | VKGKGQMKTY  | LYPKCTDHRV | IPQHQLSISP |
| 1270       | 1280        | 1290       | 1300        | 1310       | 1320       |
| DIRVQVDGSI | GRSPTDEIAN  | LVPSVQYVDK | TSLGSDSSTQ  | AKDAHLSPKR | PWKEPVKAE  |
| 1330       | 1340        | 1350       |             |            |            |
| RGRFGKAIEK | DDCDETGIEE  | ANELTKLNVS | KSV         |            |            |

|        |                 |
|--------|-----------------|
| AHNAK2 | Q8IVF2;Q8IVF2-3 |
|--------|-----------------|

| 10         | 20         | 30         | 40         | 50         | 60         |
|------------|------------|------------|------------|------------|------------|
| MCDCFHMLVP | TWPGTPGSVS | GRQLQPGEPG | AETEDDHSVT | EGPADEGIRP | RPQGSSPVYE |
| 70         | 80         | 90         | 100        | 110        | 120        |
| YTTEAADFGL | QEDAPGRQGS | AGRRRSWWKR | DSGDSRTFFR | MSRPEAVQEA | TEVTLKTEVE |
| 130        | 140        | 150        | 160        | 170        | 180        |
| AGASGYSVTG | GGDQGIQVQ  | VLKDSSAAKL | FNLREGDQLL | STTVFFENIK | YEDALKILQY |
| 190        | 200        | 210        | 220        | 230        | 240        |
| SEPYKVQFKI | RRQLPAPQDE | EWASSDAQHG | PQGKEKEDTD | VADGCRETPT | KTLEGDGDQE |
| 250        | 260        | 270        | 280        | 290        | 300        |

|             |             |              |             |            |             |
|-------------|-------------|--------------|-------------|------------|-------------|
| RLISKPRVGR  | GROSQRERLS  | WPKFQSIKSK   | RGPGPQRSHS  | SSEAYEPRDA | HDVSPSTSDT  |
| 310         | 320         | 330          | 340         | 350        | 360         |
| EAQLTVERQE  | QKAGPGSQRR  | RKFLNLRFRFRT | GSGQGFSSTG  | QPGRGFQSGV | GRAGVLEELG  |
| 370         | 380         | 390          | 400         | 410        | 420         |
| PWGDSLEETG  | AATGSRREER  | AEQDREVMIPA  | QSMPLPTELG  | DPRLCEGTPQ | EGGLRAARLH  |
| 430         | 440         | 450          | 460         | 470        | 480         |
| GKTLEGQAQE  | TAVAQRKPRA  | QPTPGMSREG   | EGEGLQSLEI  | GIARLSLRDT | TEGGTQIGPP  |
| 490         | 500         | 510          | 520         | 530        | 540         |
| EIRVRVHDLK  | TPKFASFSTEK | EPERERRRST   | PQRGKRQDAS  | SKAGTGLKGE | EVEGAGWMPG  |
| 550         | 560         | 570          | 580         | 590        | 600         |
| REPTTHAEAQ  | GDEGDGEEGL  | QRTRITEEQD   | KGREDTEGQI  | RMPKFKIPSL | GWSPSKHTKT  |
| 610         | 620         | 630          | 640         | 650        | 660         |
| GREKATEDTE  | QGREGAATAT  | ADRREQRRTE   | EGLKDKEDSD  | SMTNTTKIQL | IHDEKRLKKE  |
| 670         | 680         | 690          | 700         | 710        | 720         |
| QILTEKEVAT  | KDSKFKMPKF  | KMPLFGASAP   | GKSMEASVDV  | SAPKVEADVS | LLSMQGDLLK  |
| 730         | 740         | 750          | 760         | 770        | 780         |
| TDLSVQTPSA  | DLEVQDGQVD  | VKLPEGPLPE   | GASLKGHLPK  | VQRPSLKMPK | VDLKGPKLDDL |
| 790         | 800         | 810          | 820         | 830        | 840         |
| KGPKA EVTAP | DVKMSLSSME  | VDVQAPRAKL   | DGARLEGDLS  | LADKEVTAKD | SKFKMPKFKM  |
| 850         | 860         | 870          | 880         | 890        | 900         |
| PSFGVSAPGK  | SMEDSVDVSA  | PKVEADVSL    | SMQGLKATD   | LSIQPPSADL | EVQAGQVDVK  |
| 910         | 920         | 930          | 940         | 950        | 960         |
| LPEGPVPEGA  | GPKVHLPKVE  | MPSFKMPKVD   | LKGPQIDVKG  | PKLCLKGPKA | EVTAPDGEVS  |
| 970         | 980         | 990          | 1000        | 1010       | 1020        |
| LPSMEVDVQA  | QKAKLDGAWL  | EGDLSLADKD   | VTAKDSKFKM  | PKFKMPSFGV | SAPGKSIKAL  |
| 1030        | 1040        | 1050         | 1060        | 1070       | 1080        |
| VDVSAPKVEA  | DLSLPSMQGD  | LKTDDL SIQP  | ASTDLKVQAD  | QVDVKLPEGH | LPEGAGLKGH  |
| 1090        | 1100        | 1110         | 1120        | 1130       | 1140        |
| LPKVE MPSFK | MPKVALKGPQ  | VDVKGPKLDDL  | KSPKA EVTAP | DVEVSLPSVE | VDVEAPGAKL  |
| 1150        | 1160        | 1170         | 1180        | 1190       | 1200        |
| DSARLEGELS  | LADKDV TAKD | SRFKMPKFKM   | PSFGASAPGK  | SIEASVDVSA | PKVEADVSLP  |
| 1210        | 1220        | 1230         | 1240        | 1250       | 1260        |
| SMQGLKTTD   | LSIQPPSADL  | EVHAGQVDVK   | LLEGHVPEGA  | GFKGHLPKVQ | MPSLKMPKVD  |
| 1270        | 1280        | 1290         | 1300        | 1310       | 1320        |
| LKGPQVEVRG  | PKLCLKGHKA  | EVTAEVAVS    | LPSVEVDMQA  | PGAKLDGAQL | DGDLSLADKD  |
| 1330        | 1340        | 1350         | 1360        | 1370       | 1380        |
| VTAKDSKFKM  | PKFKMPSFGV  | SAPGKSIEAS   | VDLSAPKVEA  | DMSLPSMQGD | LKTDDL SIQP |
| 1390        | 1400        | 1410         | 1420        | 1430       | 1440        |
| PSTDLELQAG  | QLDVKLPEGP  | VPEGAGLKGH   | LPKLQMPSEK  | VPKVDLKGPE | IDIKGPKLDDL |
| 1450        | 1460        | 1470         | 1480        | 1490       | 1500        |
| KDPKVEVTAP  | DVEVSLPSVE  | VDVEAPGAKL   | DGGRLEEDMS  | LADKDLTTKD | SKFKMPKFKM  |
| 1510        | 1520        | 1530         | 1540        | 1550       | 1560        |
| PSFGVSAPGK  | SIEASVDVSA  | PKVEADVSLP   | SMQGLKATD   | LSIQPPSADL | EVQAGQVDVK  |
| 1570        | 1580        | 1590         | 1600        | 1610       | 1620        |
| LPEGPVSEGA  | GLKGHLPKVQ  | MPSFKMPKVD   | LKGPQIDVKG  | PKLCLKGPKV | EVTAPDVKMS  |
| 1630        | 1640        | 1650         | 1660        | 1670       | 1680        |
| LSSMEVDVQA  | PRAKLDGAQL  | EGDLSLADKA   | VTAKDSKFKM  | PKFKMPSFGV | SAPGKSIEAS  |
| 1690        | 1700        | 1710         | 1720        | 1730       | 1740        |
| VDVSEPKVEA  | DVSLPSMQGD  | LKTDDL SIQS  | PSADLEVQAG  | QVNVKLPEGP | LPEGAGFKGH  |
| 1750        | 1760        | 1770         | 1780        | 1790       | 1800        |
| LPKVQMPSLK  | MPKVALKGPQ  | MDVKGPKLDDL  | KGPKA EVMAP | DVEVSLPSVE | VDVEAPGAKL  |
| 1810        | 1820        | 1830         | 1840        | 1850       | 1860        |
| DSVRLEGDLS  | LADKDV TAKD | SKFKMPKFKM   | PSFGVSAPGK  | SIEASVDVSA | PKVEAEVSLP  |
| 1870        | 1880        | 1890         | 1900        | 1910       | 1920        |
| SMQGLKTTD   | LCIPLPSADL  | VVQAGQVDMK   | LPEGQVPEGA  | GLKGHLPKVD | MPSFKMPKVD  |
| 1930        | 1940        | 1950         | 1960        | 1970       | 1980        |
| LKGPQTDVKG  | AKLCLKGPKA  | EVTAPDVEVS   | LPSMEVDVQA  | QKAKLDGARL | EGDLSLADKD  |
| 1990        | 2000        | 2010         | 2020        | 2030       | 2040        |
| MTAKDSKFKM  | PKFKMPSFGV  | SAPGRSIEAS   | VDVPAPKVEA  | DVSLPSMQGD | LKTDDL SIQP |
| 2050        | 2060        | 2070         | 2080        | 2090       | 2100        |
| PSADLKVQTG  | QVDVKLPEGH  | VPEGAGLKGH   | LPKVE MPSLK | MPKVDLKGPK | VDIKGPKLDDL |
| 2110        | 2120        | 2130         | 2140        | 2150       | 2160        |
| KDPKVE MRVP | DVEVSLPSME  | VDVQAPRAKL   | DSAHLQGDLT  | LANKDLTTKD | SKFKMPKFKM  |
| 2170        | 2180        | 2190         | 2200        | 2210       | 2220        |
| PSFGVSAPGK  | SIEASVDVSP  | PKVEADMSLP   | SMQGLKTTD   | LSIQPLSADV | KVQAGQVDVK  |

|            |            |             |             |            |             |
|------------|------------|-------------|-------------|------------|-------------|
| 2230       | 2240       | 2250        | 2260        | 2270       | 2280        |
| LLEGVPPEEV | GLKGHLPKLQ | MPSFKVVPKVD | LKGPEIDIKG  | PKLCLKDPKV | EVTAPDVEVS  |
| 2290       | 2300       | 2310        | 2320        | 2330       | 2340        |
| LPSVEVDVKA | PGAKLDGARL | EGDMSLADKD  | VTAKDSKFKM  | PKFKMLSGV  | SALGKSIEAS  |
| 2350       | 2360       | 2370        | 2380        | 2390       | 2400        |
| ADVSAKVEA  | DVSLPSMQGD | LKTDLDSVQP  | PSADLEVQAG  | QVDVKLPEGP | VPEGAGLKGH  |
| 2410       | 2420       | 2430        | 2440        | 2450       | 2460        |
| LPKLQMPSEK | MPKVDLKGPO | IDVKGPKLDL  | KGPKTDVMAP  | DVEVSQPSVE | VDVEAPGAKL  |
| 2470       | 2480       | 2490        | 2500        | 2510       | 2520        |
| DGAWLEGDLS | VADKDVTTKD | SRFKIPKFKM  | PSFGVSAPGK  | SIEASVDVSA | PKVEADGSL   |
| 2530       | 2540       | 2550        | 2560        | 2570       | 2580        |
| SMQGDLCATD | LSIQPPSADL | EVQAGQVDVK  | LPEGPVPEGA  | GLKGHLPKVQ | MPSFKMPEMD  |
| 2590       | 2600       | 2610        | 2620        | 2630       | 2640        |
| LKGPQLDVKG | PKLDLKGPKA | EVTAPDVEMS  | LSSMEVDVQA  | PRAKLDGARL | EGDLSLADKG  |
| 2650       | 2660       | 2670        | 2680        | 2690       | 2700        |
| VTAKDSKFKM | PKFKMPSFRV | SAPGESIEAL  | VDVSELKVEA  | DMSLPSMQGD | LKTDLDSIQP  |
| 2710       | 2720       | 2730        | 2740        | 2750       | 2760        |
| PSAQLEVOAG | QVDVKLPEGH | VPEGAGLKGH  | LPKLQMPSEK  | MPEVDLKGPO | IDVKGPNVDL  |
| 2770       | 2780       | 2790        | 2800        | 2810       | 2820        |
| KGPKAEVTAP | DVKMSLSSME | VDVQAPRAKL  | DGARLEGDLS  | LADKGMTAKD | SKFKMPKFKM  |
| 2830       | 2840       | 2850        | 2860        | 2870       | 2880        |
| PSFGVSAPGK | SIEASVDVSE | LKVEADGSFP  | SMQGDLCATD  | IRIQPPSAQL | EVQAGQVDVK  |
| 2890       | 2900       | 2910        | 2920        | 2930       | 2940        |
| LPEGHVPEGA | GLKGHLPKVQ | MPSFKMVPKVD | LKGPQIDVKG  | PKLDLKGPKA | EVTAPDVEVS  |
| 2950       | 2960       | 2970        | 2980        | 2990       | 3000        |
| LPSVEVDVEA | PRAKLDGARL | EGDLSLADKD  | VTAKDSKFKM  | PKFKMPSFGV | SAPGKSIEVS  |
| 3010       | 3020       | 3030        | 3040        | 3050       | 3060        |
| VDVSAPKVEA | EVSLPSMQGD | LKTDLDSIEP  | PSAQLEVOAG  | QVDVKLPEGH | VPEGAGLKGH  |
| 3070       | 3080       | 3090        | 3100        | 3110       | 3120        |
| LPKLQMPSEK | MPKVDLKGPO | IDVKGPKLDL  | KGPKTDVTAP  | DVEVSQPGME | VDVEAPGAKL  |
| 3130       | 3140       | 3150        | 3160        | 3170       | 3180        |
| DGARLEGDLS | LADKDVTAKE | SKFKMPKFKM  | PSFGVSAPGK  | SIEVLVDVSA | PKVEADLSLP  |
| 3190       | 3200       | 3210        | 3220        | 3230       | 3240        |
| SMQGDLCNTD | ISIEPPSAQL | EVQAGQVDVK  | LPEGHVLEGA  | GLKGHLPKLQ | MPSFKMVPKVD |
| 3250       | 3260       | 3270        | 3280        | 3290       | 3300        |
| RKGPQIDIKG | PKLDLKGPKM | DVTAPDVEVS  | QPSMEVDVEA  | PGAKLDGARL | EGDLSLADKD  |
| 3310       | 3320       | 3330        | 3340        | 3350       | 3360        |
| VTAKDSKFKM | PKFKMPSYRA | SAPGKSIQAS  | VDVSAPKAEA  | DVSLPSMQGD | LKTDLDSIQL  |
| 3370       | 3380       | 3390        | 3400        | 3410       | 3420        |
| PSVDLEVQAG | QVDVKLPEGH | VPEGAGLKGH  | LPKVEMPSFK  | MPKVDLKSPO | VDIKGPKLDL  |
| 3430       | 3440       | 3450        | 3460        | 3470       | 3480        |
| KVPKAEVTVP | DVEVSLPSVE | VDVQAPRAKL  | DGARLEGDLS  | LAEKDVTAKE | SKFKMPKFKM  |
| 3490       | 3500       | 3510        | 3520        | 3530       | 3540        |
| PSFGVSAPGR | SIEASLDVSA | PKVEADVSL   | SMQGDLCATD  | LSIQPPSADL | EVQAVQVDVE  |
| 3550       | 3560       | 3570        | 3580        | 3590       | 3600        |
| LLEGVPPEGA | GLKGHLPKVE | MPSLKTVPKVD | LKGPQIDVKG  | PKLDLKGPKA | EVRVPDVEVS  |
| 3610       | 3620       | 3630        | 3640        | 3650       | 3660        |
| LPSVEVDVQA | PKAKLDAGRL | EGDLSLADKD  | VTAKDSKFKM  | PKFKMPSFRV | SAPGKSMEAS  |
| 3670       | 3680       | 3690        | 3700        | 3710       | 3720        |
| VDVSAPKVEA | DVSLPSMQGD | LKTDLDSIQP  | PSADLKVQAG  | QMDVKLPEGO | VPEGAGLKEH  |
| 3730       | 3740       | 3750        | 3760        | 3770       | 3780        |
| LPKVEMPSLK | MPKVDLKGPO | VDIKGPKLDL  | KVSKAEVTAP  | DVEVSLPSVE | VDVQAPRAKL  |
| 3790       | 3800       | 3810        | 3820        | 3830       | 3840        |
| DSAQLEGDLS | LADKDVTAKE | SKFKMPKFKM  | PSFGVSAPGK  | SIEASVHVS  | PKVEADVSLP  |
| 3850       | 3860       | 3870        | 3880        | 3890       | 3900        |
| SMQGDLCATD | LSIQPHSADL | TVQARQVDMK  | LLEGHVPEEA  | GLKGHLPKVQ | MPSFKMVPKVD |
| 3910       | 3920       | 3930        | 3940        | 3950       | 3960        |
| LKGPEIDIKG | PKLCLKDPKV | EVTAPDVEVS  | LPSVEVDVEA  | PGAKLDGARL | EGDLSLADKD  |
| 3970       | 3980       | 3990        | 4000        | 4010       | 4020        |
| MTAKDSKFKM | PKFKMPSFGV | SAPGKSMEAS  | VDVTAPKVEA  | DVSLPSMQGD | LKATDLDSVQP |
| 4030       | 4040       | 4050        | 4060        | 4070       | 4080        |
| PSADLEVQAG | QVDVKLPEGP | VPEGASLKGH  | LPKLVQMPSEK | MPKVDLKGPO | IDVKGPKLDL  |
| 4090       | 4100       | 4110        | 4120        | 4130       | 4140        |
| KGPKAEVTAP | DVKMSLSSME | VDVQAPRAKL  | DGVQLEGDLS  | LADKDVTAKE | SKFKMPKFKM  |
| 4150       | 4160       | 4170        | 4180        | 4190       | 4200        |

PSFGVSAPGK SMEASVDVSE LKAKADVSLP SMQGLKTTD LSIQSPSADL EVQAGQVDVK  
 4210 4220 4230 4240 4250 4260  
 LPEGPLPKGA GLKGHLPKVQ MPCLKMPKVA LKGPQVDVKG PKLDLKGPKA DVMTPVVEVS  
 4270 4280 4290 4300 4310 4320  
 LPSMEVDVEA PGAKLDSVRL EGDLSLADKD MTAKDSKFKM PKFKMPSFGV SAPGKSIEAS  
 4330 4340 4350 4360 4370 4380  
 LDVSALKVEA DVSLPSMQGD LKTTHLSIQP PSADLEVQAG QEDVKLPEGP VHEGAGLKGH  
 4390 4400 4410 4420 4430 4440  
 LPKLQMPSPFK VPKVDLKGPO IDVNVPKLDL KGPKVEVTSP NLDVSLPSME VDIQAPGAKL  
 4450 4460 4470 4480 4490 4500  
 DSTRLEGDLS LADKDVTAKD SKFKMPKFKM PSFGMLSPGK SIEVSVDSVA PKMEADMSIP  
 4510 4520 4530 4540 4550 4560  
 SMQGLKTTD LRIQAPSADL EVQAGQVDLK LPEGHMPEVA GLKGHLPKVE MPSFKMPKVD  
 4570 4580 4590 4600 4610 4620  
 LKGPQVDVKG PKLDLKGPKA EVMAPDVEVS LPSVETDVQA PGSMLDGARL EGDLSLAHED  
 4630 4640 4650 4660 4670 4680  
 VAGKDSKFGQ PKLSTSGFEW SSKKVSMSSS EIEGNVTFHE KTSTFPIVES VVHEGDLHDP  
 4690 4700 4710 4720 4730 4740  
 SRDGNLGLAV GEVGMDSKFK KLHFKVPKVS FSSTKTPKDS LVPGAKSSIG LSTIPLSSSE  
 4750 4760 4770 4780 4790 4800  
 CSSFELQQVS ACSEPSMQMP KVGAFAGFPSS RLDLTGPHFE SSILSPCEDV TLTKYQVTVP  
 4810 4820 4830 4840 4850 4860  
 RAALAPELAL EIPSGSQADI PLPKTECSTD LQPPEGVPTS QAESHSGPLN SMIPVSLGQV  
 4870 4880 4890 4900 4910 4920  
 SFPKFKPKPF VFSVPQMAVP EGDHLAAVGA PVMSPLSPGE RVQCPLPSTQ LPSPGTCVSQ  
 4930 4940 4950 4960 4970 4980  
 GPEELVASLQ TSVVAPGEAP SEDADHEGKG SPLKMPKIKL PSFRWSPKKE TGPKVDPECS  
 4990 5000 5010 5020 5030 5040  
 VEDSKLSLVL DKDEVAPQSA IHMDLPPERD GEKGRSTKPG FAMPKLALPK MKASKSGVSL  
 5050 5060 5070 5080 5090 5100  
 PQRDVDPSSL SATAGGSFQD TEKASSDGGG GGLGATASAT GSEGVNLHRP QVHIPSLGFA  
 5110 5120 5130 5140 5150 5160  
 KPDLRSSKAK VEVSQPEADL PLPKHDLSTE GDSRGCGLGD VPVSQPCGEG IAPTPEPLQ  
 5170 5180 5190 5200 5210 5220  
 PSCRKPAEV LTVESPEEEA MTKYSQESWF KMPKFRMPSL RRSFRDRGGA GKLEVAQTQA  
 5230 5240 5250 5260 5270 5280  
 PAATGGEAAA KVKEFLVSGS NVEAAMSLQL PEADA EVTAS ESKSSTDILR CDLDSTGLKL  
 5290 5300 5310 5320 5330 5340  
 HLSTAGMTGD ELSTSEVRIH PSKGPLPFQM PGMRLPETQV LPGEIDETPL SKPGHDLASM  
 5350 5360 5370 5380 5390 5400  
 EDKTEKWSSQ PEGPLKLIKAS STDMPSQISV VNVDQLWEDS VLTVKFPKLM VPRFSFPAPS  
 5410 5420 5430 5440 5450 5460  
 SEDDVFIPTV REVQCPEANI DTALCKESPG LWGASILKAG AGVPGEQPVD LNLPLEAPPI  
 5470 5480 5490 5500 5510 5520  
 SKVRVHIQGA QVESQEVTIH SIVTPEFVDL SVPRTFSTQI VRESEIPTSE IQTPSYGFSL  
 5530 5540 5550 5560 5570 5580  
 LKVKIPEPHT QARVYTTMTQ HSRTQEGTEE APIQATPGVD SIGDLQPD T GEPFEMISSS  
 5590 5600 5610 5620 5630 5640  
 VNVLGQQTLT FEVPSGHQLA DSCSDEEPAE ILEFPDDSDQ EATTPLADEG RAPKDKPESK  
 5650 5660 5670 5680 5690 5700  
 KSGLLWFWLP NIGFSSSVDE TGVDKNDVQ RSAPIQTQPE ARPEAELPKK QEKAGWFRFP  
 5710 5720 5730 5740 5750 5760  
 KLGFSSTPTK KSKSTEDGAE LEEQKLOEET ITFFDARESF SPEEKEEGEL IGPVGTGLDS  
 5770 5780 5790  
 RVMVTSAAART ELILPEQDRK ADDESKGSGL GPNEG

| C2orf49    | Q9BVC5     |            |            |            |            |
|------------|------------|------------|------------|------------|------------|
| 10         | 20         | 30         | 40         | 50         | 60         |
| MAGDVGRSC  | TDSELLLHPE | LLSQEFLLLT | LEQKNIAVET | DVRVNKDSLT | DLYVQHAIPL |
| 70         | 80         | 90         | 100        | 110        | 120        |
| PQRDLPKNRW | GKMMKKREQ  | HEIKNETKRS | STVDGLRKR  | LIVFDGSSTS | TSIKVKKTEN |
| 130        | 140        | 150        | 160        | 170        | 180        |
| GDNDR      | LKPPP      | QASFTSNAFR | KLSNSSSSVS | PLILSSNLPV | NNKTEHNNND |
| 190        | 200        | 210        | 220        | 230        | AKQNHDLTHR |
| KSPSGPVKSP | PLSPVGTTPV | KLKRAAPKEE | AEAMNNLKPP | QAKRKIQHVT | WP         |

| CLASP1 | Q7Z460;Q7Z460-3;Q7Z460-2 |  |  |  |  |
|--------|--------------------------|--|--|--|--|
|--------|--------------------------|--|--|--|--|

| 10         | 20              | 30            | 40              | 50                | 60                 |
|------------|-----------------|---------------|-----------------|-------------------|--------------------|
| MEPRMESCLA | QVLQKDVGKR      | LQVGQELIDY    | FSDKQKSADL      | EHDQTMLDKL        | VDGLATSWVN         |
| 70         | 80              | 90            | 100             | 110               | 120                |
| SSNYKVVLG  | MDILSALVTR      | LQDRFKAQIG    | TVLPSLIDRL      | GDAKDSVREQ        | DQTLLKIMD          |
| 130        | 140             | 150           | 160             | 170               | 180                |
| QAANPQYVWD | RMLGGFKHKN      | FRTREGICLC    | LIATLNASGA      | QTLTLSKIVP        | HICNLLGDPN         |
| 190        | 200             | 210           | 220             | 230               | 240                |
| SQVRDAAINS | LVEIYRHVGE      | RVRADLSKKG    | LPQSRLNVIF      | TKFDEVQKSG        | NMIQSANDKN         |
| 250        | 260             | 270           | 280             | 290               | 300                |
| FDDEDSVD   | GN RPSSASSTSS   | KAPPSSRRNV    | GMGTTRRLGS      | STLGSKSSAA        | KEGAGAVDEE         |
| 310        | 320             | 330           | 340             | 350               | 360                |
| DFIKAFDDVP | VVQIYSSRDL      | EESINKIREI    | LSDDKHDWEQ      | RVNALKKIRS        | LLLAGAAEYD         |
| 370        | 380             | 390           | 400             | 410               | 420                |
| NFFQHLRLLD | GAFKLSAKDL      | RSQVVR        | EACI TLGHLSSVLG | NKFDHGAEAI        | MPTIFNLIPN         |
| 430        | 440             | 450           | 460             | 470               | 480                |
| SAKIMATSGV | VAVRLIIRHT      | HIPRLIPVIT    | SNCTSK          | SVAV RRRCFEFLDL   | LLQEWQTHSL         |
| 490        | 500             | 510           | 520             | 530               | 540                |
| ERHISVLAET | IKKGIHDADS      | EARIEARKCY    | WGFHSHFSRE      | AEHLYHTLES        | SYQKALQSHL         |
| 550        | 560             | 570           | 580             | 590               | 600                |
| KNSDSIVSLP | QSDR            | SSSSSQ        | ESLNRPLSAK      | RSPTGSTTSR        | ASTVSTKSVS         |
| 610        | 620             | 630           | 640             | 650               | 660                |
| DIDVNAASA  | KSKVSSSSGT      | TPFSSAAALP    | PGSYASLGRI      | RTR               | RQSSGSA TNVASTPDNR |
| 670        | 680             | 690           | 700             | 710               | 720                |
| GRSRAKVVSQ | SQRSRSANPA      | GAGSRSSSPG    | KLLGSGYGGL      | TGGSSR            | GPPV TPSSEKRSKI    |
| 730        | 740             | 750           | 760             | 770               | 780                |
| PRSQGCSRET | SPNRIGLARS      | SRIPRPSMSQ    | GCSRDT          | SRES SRDTSPARGF   | PPLDR              |
| 790        | 800             | 810           | 820             | 830               | 840                |
| PGRIPGSVNA | MRVLSTSTD       | EAAVADALK     | KPVRRRYEPYG     | MYSDDDANS         | DASSVC             |
| 850        | 860             | 870           | 880             | 890               | 900                |
| GSRNGGIPHY | LRQTEDVAEV      | LNHCASSNWS    | ERKEGLLGLQ      | NLLKSQRTLS        | RVELKRLCEI         |
| 910        | 920             | 930           | 940             | 950               | 960                |
| FTRMFADPHS | KRVFSMFLET      | LVDFIIHKD     | DLQDWL          | FVLL TQLLKKMGAD   | LLGSVQAKVQ         |
| 970        | 980             | 990           | 1000            | 1010              | 1020               |
| KALDVTRDSF | PFDDQFNILM      | RFIVDQTQTP    | NLKVKVA         | ILK YIESLAR       | QMD PTDFVNSSET     |
| 1030       | 1040            | 1050          | 1060            | 1070              | 1080               |
| RLAVSRIITW | TTEPK           | SSDVR         | KAAQIVLISL      | FELNTPEFTM        | LLGALPKTFQ         |
| 1090       | 1100            | 1110          | 1120            | 1130              | 1140               |
| LKNSSNTSVG | SPSNTIGR        | TTPSRHTSSRTSP | LTSP            | TNC SHG GLSPSRLWG | W SADGLAKHPP       |
| 1150       | 1160            | 1170          | 1180            | 1190              | 1200               |
| PFSQPNSIPT | APSHKALRRS      | YSPSMLDYDT    | ENLNSE          | EIYS SLRGVTEAIE   | KFSFR              |
| 1210       | 1220            | 1230          | 1240            | 1250              | 1260               |
| NEPIKR     | DGKK ECDIVSRDGG | AASPATEGRG    | GSEVEGGRTA      | LDNK              | TSL LNT QPPRAFPGPR |
| 1270       | 1280            | 1290          | 1300            | 1310              | 1320               |
| ARDYNPYPYS | DAINTYDKTA      | LKEAVFDDDM    | EQLR            | DVPIDH            | SDLVADLLKE         |
| 1330       | 1340            | 1350          | 1360            | 1370              | 1380               |
| RKGALLELLK | ITREDSLG        | VW EEHFKTILL  | LLET            | LGDKDH            | SIRALALRVL         |
| 1390       | 1400            | 1410          | 1420            | 1430              | 1440               |
| FKNYAELTIM | KTLEAHKDSH      | KEVVRAAEEA    | ASTLASSIHP      | EQCIK             | VLCP I IQTADYPINL  |
| 1450       | 1460            | 1470          | 1480            | 1490              | 1500               |
| AAIKMQTKVV | ERIAKESLLQ      | LLVDIIPGLL    | QGYDNTESSV      | RKASV             | FCLVA IYSVIGEDLK   |
| 1510       | 1520            | 1530          |                 |                   |                    |
| PHLAQLTGSK | MKLLNLYIKR      | AQTTNSNSSS    | SSDVSTHS        |                   |                    |

| CLASP2 | O75122;O75122-2 |  |  |  |  |
|--------|-----------------|--|--|--|--|
|--------|-----------------|--|--|--|--|

| 10         | 20     | 30     | 40         | 50         | 60         |
|------------|--------|--------|------------|------------|------------|
| MAMGDDKSF  | DEESVD | GNRP   | SSAASAFK   | VP         | APKTS      |
| 70         | 80     | 90     | 100        | 110        | 120        |
| GAGAVDEDDF | IKAF   | TDVPSI | QIYSSR     | ELEE       | TLNK       |
| 130        | 140    | 150    | 160        | 170        | 180        |
| VAGAAQYDCF | FQHLR  | LLDGA  | LKLSAKDLRS | QVVREACITV | AHLSTVLGNK |
| 190        | 200    | 210    | 220        | 230        | 240        |

|            |            |             |            |            |            |            |
|------------|------------|-------------|------------|------------|------------|------------|
| TLFNLVPNSA | KVMATSGCAA | IRFIIRHTHV  | PRLIPLITSN | CTSK       | SVPVRR     | RSFEFLDLLL |
| 250        | 260        | 270         | 280        | 290        | 300        |            |
| QEWQTHSLER | HAAVLVETIK | KGIHDADAEA  | RVEARKTYMG | LRNHFPGEAE | TLYNSLEPSY |            |
| 310        | 320        | 330         | 340        | 350        | 360        |            |
| QKSLQTYLKS | SGSVASLPQS | DRSSSSSQES  | LNRPFSSKWS | TANPSTVAGR | VSAGSSK    | ASS        |
| 370        | 380        | 390         | 400        | 410        | 420        |            |
| LPGSLQRSRS | DIDVNAAAGA | KAHHAAGQSV  | RRGRLGAGAL | NAGSYASLED | TSDKLDGTAS |            |
| 430        | 440        | 450         | 460        | 470        | 480        |            |
| EDGRVRAKLS | APLAGMGNAK | ADSRGRSRTK  | MVSQSQPGSR | SGSPGR     | VLTT       | TALSTVSSGV |
| 490        | 500        | 510         | 520        | 530        | 540        |            |
| QRVLVNSASA | QKRSKIPRSQ | GCSREASPSR  | LSVARSSR   | IP         | RPSVSQCSR  | EASRESSRDT |
| 550        | 560        | 570         | 580        | 590        | 600        |            |
| SPVRSFQPLA | SRHHSRSTGA | LYAPEVYGAS  | GPGYGISQSS | RLSSSVSAMR | VLNTGSDVEE |            |
| 610        | 620        | 630         | 640        | 650        | 660        |            |
| AVADALKKPA | RRRYESYGMH | SDDDANSDAS  | SACSERSYSS | RNGSIPTYMR | QTEDVAEVLN |            |
| 670        | 680        | 690         | 700        | 710        | 720        |            |
| RCASSNWSER | KEGLLGLQNL | LKNQRTLSRV  | ELKRLCEIFT | RMFADPHGKR | VFSMFLETLV |            |
| 730        | 740        | 750         | 760        | 770        | 780        |            |
| DFIQVHKDDL | QDWLFVLLTQ | LLKKMGADLL  | GSVQAKVQKA | LDVTRESFPN | DLQFNILMRF |            |
| 790        | 800        | 810         | 820        | 830        | 840        |            |
| TVDQTQTPSL | KVKVAILKYI | ETLAKQMDPG  | DFINSSETRL | AVSR       | VITWTT     | EPKSSDVRKA |
| 850        | 860        | 870         | 880        | 890        | 900        |            |
| AQSVLISLFE | LNTPEFTMLL | GALPKTFQDG  | ATKLLHNHLR | NTGNGTQSSM | GSPLTRPTPR |            |
| 910        | 920        | 930         | 940        | 950        | 960        |            |
| SPANWSSPLT | SPTNTSQNTL | SPSAFDYDTE  | NMNSEDIYSS | LRGVTEAIQN | FSFR       | SQEDMN     |
| 970        | 980        | 990         | 1000       | 1010       | 1020       |            |
| EPLKRDSKDD | DGDSMCGGPG | MSDPRAGGDA  | TDSSQTALDN | KASLLHSMPT | HSSPRSRDYN |            |
| 1030       | 1040       | 1050        | 1060       | 1070       | 1080       |            |
| PYNYSDSISP | FNKSALKEAM | FDDDADQFPD  | DLSLDHSDLV | AELLKELSNH | NERVEERKIA |            |
| 1090       | 1100       | 1110        | 1120       | 1130       | 1140       |            |
| LYELMKLTQE | ESFSVWDEHF | KTILLLLLEET | LGDKPTIRA  | LALKVLREIL | RHQPARFKNY |            |
| 1150       | 1160       | 1170        | 1180       | 1190       | 1200       |            |
| AELTVMKTLE | AHKDPHKEVV | RSAAEEAASVL | ATSISPEQCI | KVLCPIIQTA | DYPINLAAIK |            |
| 1210       | 1220       | 1230        | 1240       | 1250       | 1260       |            |
| MQTKVIERVS | KETLNLLLPE | IMPGLIQGYD  | NSESSVRKAC | VFCLVAVHAV | IGDELKPHLS |            |
| 1270       | 1280       | 1290        |            |            |            |            |
| QLTGSKMKLL | NLYIKRAQTG | SGGADPTTDV  | SGQS       |            |            |            |

| CUL4B      | Q13620;Q13620-1;Q13620-3;Q13619;Q13619-2 |            |            |             |            |            |
|------------|------------------------------------------|------------|------------|-------------|------------|------------|
|            | 10                                       | 20         | 30         | 40          | 50         | 60         |
| MMSQSSGSGD | GNDDEATTSK                               | DGGFSSPSPS | AAAAAQEVRS | ATD         | GNTSTTP    | PTSAK      |
| 70         | 80                                       | 90         | 100        | 110         | 120        |            |
| SSSSSSSNSS | NEREDFDSTS                               | SSSSTPPLQP | RDSASPSTSS | FCLGVSVAAS  | SHVPIQK    | KLR        |
| 130        | 140                                      | 150        | 160        | 170         | 180        |            |
| FEDTLEFVGF | DAKMAEESS                                | SSSSSPTAA  | TSQQQQLKKN | SILISSVASV  | HHANGLAK   | SS         |
| 190        | 200                                      | 210        | 220        | 230         | 240        |            |
| TTVSSFANSK | PGSAK                                    | KLVIK      | NFKDKPKLPE | NYTDETWQKL  | KEAVEAIQNS | TSIKYNLEEL |
| 250        | 260                                      | 270        | 280        | 290         | 300        |            |
| YQAVENLCSY | KISANLYK                                 | QL         | QICEDHIKA  | QIHQFREDSL  | DSVLFLLK   | KID        |
| 310        | 320                                      | 330        | 340        | 350         | 360        |            |
| IMIRSIFLFL | DRTYVLQNSM                               | LPSIWDMGLE | LFRAHIISDQ | KVQNKTIIDGI | LLLIERERNG |            |
| 370        | 380                                      | 390        | 400        | 410         | 420        |            |
| EAIDRSLIRS | LLSMLSDLQI                               | YQDSFEQR   | FL         | EETNR       | LYAAE      | GQKLMQER   |
| 430        | 440                                      | 450        | 460        | 470         | 480        |            |
| LEEEADR    | LIT                                      | YLDQTTQK   | SL         | IATVEK      | QLLG       | EHLTAILQK  |
| 490        | 500                                      | 510        | 520        | 530         | 540        |            |
| SRVRGGVQVL | LQQWIEYIKA                               | FGSTIVINPE | KDKTMVQELL | DFKDKVDHII  | DICFLKNEKF |            |
| 550        | 560                                      | 570        | 580        | 590         | 600        |            |
| INAMKEAFET | FINKRPNKPA                               | ELIAKYVDSK | LRAGNKEATD | EELEKMLDKI  | MIIFRFIYGK |            |
| 610        | 620                                      | 630        | 640        | 650         | 660        |            |
| DVFEAFYKDD | LAKRLLVGKS                               | ASVDAEKSM  | SKLKHECGAA | FTSKLEGMFK  | DMELSKDIMI |            |
| 670        | 680                                      | 690        | 700        | 710         | 720        |            |
| QFKQYMQNQN | VPGNIELTVN                               | ILTMGYWPTY | VPMEVHLPPE | MVKLQEIFKT  | FYLGKHSGRK |            |



|                |            |            |            |             |            |
|----------------|------------|------------|------------|-------------|------------|
| 730            | 740        | 750        | 760        | 770         | 780        |
| LQWQSTLGH      | VLKAEFKEGK | KELQVSLFQT | LVLMLFNEGE | EFSLLEEIKQA | TGIEDGELRR |
| 790            | 800        | 810        | 820        | 830         | 840        |
| TLQSLACGKA     | RVLAKNPKGK | DIEDGDKFIC | NDDFKHKLFR | IKINQIQMKE  | TVEEQASTTE |
| 850            | 860        | 870        | 880        | 890         | 900        |
| RVFQDRQYQI     | DAAIVRIMKM | RKTLSHNLLV | SEVYNQLKFP | VKPADLKKRI  | ESLIDRDYME |
| 910            |            |            |            |             |            |
| RDKENPNQYN YIA |            |            |            |             |            |

| GSN        |            | P06396;P06396-3;P06396-2;CON_Q3SX14 |            |            |            |
|------------|------------|-------------------------------------|------------|------------|------------|
| 10         | 20         | 30                                  | 40         | 50         | 60         |
| MAPHRPAPAL | LCALSLALCA | LSLPVRAATA                          | SRGASQAGAP | QGRVPEARPN | SMVVEHPEFL |
| 70         | 80         | 90                                  | 100        | 110        | 120        |
| KAGKEPGLQI | WRVEKFDLVP | VPTNLYGDF                           | TGDAYVILKT | VQLRNGNLQY | DLHYWLGNEC |
| 130        | 140        | 150                                 | 160        | 170        | 180        |
| SQDESGAAAI | FTVQLDDYLN | GRAVQHREVQ                          | GFESATFLGY | FKSGLKYKKG | GVASGFKHV  |
| 190        | 200        | 210                                 | 220        | 230        | 240        |
| PNEVVVQRLF | QVKGRRVVRA | TEVPVSWESF                          | NNGDCFILDL | GNNIHQWCGS | NSNRYERLKA |
| 250        | 260        | 270                                 | 280        | 290        | 300        |
| TQVSKGIRDN | ERSGRARVHV | SEEGTEPEAM                          | LQVLGPKPAL | PAGTEDTAKE | DAANRKLAKL |
| 310        | 320        | 330                                 | 340        | 350        | 360        |
| YKVSNGAGTM | SVSLVADENP | FAQGALKSED                          | CFILDHGKDG | KIFVWKGKQA | NTEERKAALK |
| 370        | 380        | 390                                 | 400        | 410        | 420        |
| TASDFITKMD | YPKQTQVSVL | PEGGETPLFK                          | QFFKNWRDPD | QTDGLGLSYL | SSHIANVERV |
| 430        | 440        | 450                                 | 460        | 470        | 480        |
| PFDAATLHTS | TAMAAQHGM  | DDGTGQKQIW                          | RIEGSNKVPV | DPATYQQFYG | GDSYIILYNY |
| 490        | 500        | 510                                 | 520        | 530        | 540        |
| RHGGRQGQII | YNWQGAQSTQ | DEVAASAILT                          | AQLDEELGGT | PVQSRVVQGK | EPAHLMSLFG |
| 550        | 560        | 570                                 | 580        | 590        | 600        |
| GKPMIYKGG  | TSREGGQTAP | ASTRLFQVRA                          | NSAGATRAVE | VLPKAGALNS | NDAFVLKTPS |
| 610        | 620        | 630                                 | 640        | 650        | 660        |
| AAYLWVGTGA | SEAEKTGAQE | LLRVLRAQPV                          | QVAEGSEPDG | FWEALGGKAA | YRTSPRLKDK |
| 670        | 680        | 690                                 | 700        | 710        | 720        |
| KMDAHPRLRF | ACSNKIGRFV | IEEVPGELMQ                          | EDLATDDVML | LDTWDQVFW  | VGKDSQEEEE |
| 730        | 740        | 750                                 | 760        | 770        | 780        |
| TEALTSAKRY | IETDPANRDR | RTPITVVKQG                          | FEPPSFVGWF | LGWDDDYWSV | DPLDRAMAE  |
| AA         |            |                                     |            |            |            |

| ILF3       |            | Q12906;Q12906-3;Q12906-2;Q12906-5;Q12906-7;Q12906-6;Q12906-4;Q96SI9;Q96SI9-2 |            |            |            |
|------------|------------|------------------------------------------------------------------------------|------------|------------|------------|
| 10         | 20         | 30                                                                           | 40         | 50         | 60         |
| MRPMRIFVND | DRHVMMAKSS | VYPTQEELEA                                                                   | VQNMVSHTER | ALKAVSDWID | EQEKSSEQA  |
| 70         | 80         | 90                                                                           | 100        | 110        | 120        |
| ESDNMDVPPE | DDSKEGAGEQ | KTEHMTRTLR                                                                   | GVMRVGLVAK | GLLLKGDLDL | ELVLLCKEKP |
| 130        | 140        | 150                                                                          | 160        | 170        | 180        |
| TTALLDKVAD | NLAIQLAAVT | EDKYEILQSV                                                                   | DDAAIVIKNT | KEPPLSLTIH | LTSPVVREEM |
| 190        | 200        | 210                                                                          | 220        | 230        | 240        |
| EKVLAGETLS | VNDPPDVLDR | QKCLAALASL                                                                   | RHAKWFQARA | NGLKSCVIVI | RVLRDLCTRV |
| 250        | 260        | 270                                                                          | 280        | 290        | 300        |
| PTWGPLRGWP | LELLCEKSIG | TANRPMGAGE                                                                   | ALRRVLECLA | SGIVMPDGSG | IYDPCEKEAT |
| 310        | 320        | 330                                                                          | 340        | 350        | 360        |
| DAIGHLDRQQ | REDITQSAQH | ALRLAAFQQL                                                                   | HKVLGMDPLP | SKMPKPKNE  | NPVDYTVQIP |
| 370        | 380        | 390                                                                          | 400        | 410        | 420        |
| PSTTYAITPM | KRPMEEDGEE | KSPSKKKKKI                                                                   | QKKEEKAEPP | QAMNALMRLN | QLKPGLYQKL |
| 430        | 440        | 450                                                                          | 460        | 470        | 480        |
| VSQTGPVHAP | IFTMSVEVDG | NSFEASGPSK                                                                   | KTAKLHVAVK | VLQDMGLPTG | AEGRDSSKGE |
| 490        | 500        | 510                                                                          | 520        | 530        | 540        |
| DSAEETEAKP | AVVAPAPVVE | AVSTPSAAFP                                                                   | SDATAEQGPI | LTKHGKNPVM | ELNEKRRGLK |
| 550        | 560        | 570                                                                          | 580        | 590        | 600        |
| YELISETGGS | HDKRFVMEVE | VDGQKFQAG                                                                    | SNKKVAKAYA | ALAALEKLFP | DTPLALDANK |
| 610        | 620        | 630                                                                          | 640        | 650        | 660        |
| KKRAPVPVRG | GPKFAAKPHN | PGFGMGPMH                                                                    | NEVPPPPNLR | GRGRGGSIRG | RGRGRGFGGA |

|             |            |            |            |            |             |
|-------------|------------|------------|------------|------------|-------------|
| 670         | 680        | 690        | 700        | 710        | 720         |
| NHGGYMNAGA  | GYGSYGYGGN | SATAGYSQFY | SNGGHSNGAS | GGGGGGGGGS | SGYGSYYQGD  |
| 730         | 740        | 750        | 760        | 770        | 780         |
| NYNSPVPPKH  | AGKKQPHGGQ | QKPSYSGSYQ | SHQGQQQSYN | QSPYSNYGPP | Q GKQKGYNHG |
| 790         | 800        | 810        | 820        | 830        | 840         |
| QGSYSYSNSY  | NSPGGGGGSD | YNYESKFNYS | GSGGRSNGNS | YGSGGASYNP | GSHGGYGGGS  |
| 850         | 860        | 870        | 880        | 890        |             |
| GGGSSYQ GKQ | GGYSQSNYNS | PGSGQNYSGP | PSSYQSSQGG | YGRNADHSMN | YQYR        |

|         |                          |
|---------|--------------------------|
| LRRFIP1 | Q32MZ4;Q32MZ4-2;Q32MZ4-3 |
|---------|--------------------------|

|            |             |            |             |            |              |
|------------|-------------|------------|-------------|------------|--------------|
| 10         | 20          | 30         | 40          | 50         | 60           |
| MTSPAAAQSR | EIDCLSPEAQ  | KLAEARLAAK | RAARAEAREI  | RMKELERQQK | EEDSERYSRR   |
| 70         | 80          | 90         | 100         | 110        | 120          |
| SRRNTSASDE | DERMSVGSRG  | SLRVEERPEK | DFTEKGSRNM  | PGLSAATLAS | LGGTSSRRGS   |
| 130        | 140         | 150        | 160         | 170        | 180          |
| GDTSISIDTE | ASIREIKELN  | ELKDQIQDVE | GKYMQLKEM   | KDSLAEVEEK | YKKAMVSNAG   |
| 190        | 200         | 210        | 220         | 230        | 240          |
| LDNEKTNFMY | QVDTLKDMLL  | ELEEQLAESR | RQYEEKNKEF  | EREKHAHSIL | QFQFAEVKEA   |
| 250        | 260         | 270        | 280         | 290        | 300          |
| LKQREEMLEK | HGIILNSEIA  | TNGETSDTLN | NVGYQGPTKM  | TKEELNALKS | TGDGTLGRAS   |
| 310        | 320         | 330        | 340         | 350        | 360          |
| EVEVKNEIVA | NVGKREILHN  | TEKEQHTEDT | VKDCVDIEVF  | PAGENTEDQK | SSED TAPFLG  |
| 370        | 380         | 390        | 400         | 410        | 420          |
| TLAGATYEEQ | VQSQILESSS  | LPENTVQVES | NEVMGAPDDR  | TRTPLEPSNC | WSDL DGGNHT  |
| 430        | 440         | 450        | 460         | 470        | 480          |
| ENVGEAAVTQ | VEEQAGTVAS  | CPLGHSDDTV | YHDDKCMVEV  | PQELETSTGH | SLEKEFTNQE   |
| 490        | 500         | 510        | 520         | 530        | 540          |
| AAEPKEVPAH | STEVGRDHNE  | EEGEETGLRD | EKPIKTEVPG  | SPAGTEGNCQ | EATGPSTVDT   |
| 550        | 560         | 570        | 580         | 590        | 600          |
| QNEPLDMKEP | DEEKSDQQGE  | ALDSSQKTK  | NKKKKK NKKK | SPVPVETLKD | VKKELTYQNT   |
| 610        | 620         | 630        | 640         | 650        | 660          |
| DLSEIKEEEQ | VKSTDRKSAV  | EAQNEVTENP | KQKIAAESSE  | NVDCPENPKI | KLDGKLDQEG   |
| 670        | 680         | 690        | 700         | 710        | 720          |
| DDVQTAAEEV | LADGDTLDFE  | DDTVQSSGPR | AGGEELDEGV  | AKDNAKID   | GATQSSPAEPKS |
| 730        | 740         | 750        | 760         | 770        | 780          |
| EDADRCTLPE | HESPSQDISD  | ACEAESTERC | EMSEHPSQTV  | RKALDSNSLE | NDDL SAPGRE  |
| 790        | 800         |            |             |            |              |
| PGHFNPEPRE | DTRGGNEK GK | SKEDCTMS   |             |            |              |

|       |                                   |
|-------|-----------------------------------|
| PLIN3 | O60664;O60664-4;O60664-3;O60664-2 |
|-------|-----------------------------------|

|            |            |            |             |            |             |
|------------|------------|------------|-------------|------------|-------------|
| 10         | 20         | 30         | 40          | 50         | 60          |
| MSADGAEADG | STQVTVEEPV | QQPSVVDRVA | SMPLISSTCD  | MVSAAYASTK | ESYPHIKTVC  |
| 70         | 80         | 90         | 100         | 110        | 120         |
| DAAEKGVRTL | TAAAVSGAQP | ILSKLEPQIA | SASEYAHRL   | DKLEENLPIL | QQPTEKVLAD  |
| 130        | 140        | 150        | 160         | 170        | 180         |
| TKELVSSKVS | GAQEMVSSAK | DTVATQLSEA | VDATR GAVQS | GVDKTKSVVT | GGVQSVMSGSR |
| 190        | 200        | 210        | 220         | 230        | 240         |
| LGQMVLSGVD | TVLGKSEEWA | DNHLPLTDAE | LARIATSLDG  | FDVASVQQQR | QEQSYFVRLG  |
| 250        | 260        | 270        | 280         | 290        | 300         |
| SLSERLRQHA | YEHSLGKLRA | TKQRAQEALL | QLSQVLSLME  | TVKQGVQK L | VEGQEK LHQM |
| 310        | 320        | 330        | 340         | 350        | 360         |
| WLSWNQKQLQ | GPEKEPPKPE | QVESRALTMF | RDIAQQQLQAT | CTSLGSSIQQ | LPTNVK DQVQ |
| 370        | 380        | 390        | 400         | 410        | 420         |
| QARRQVEDLQ | ATFSSIHSFQ | DLSSSILAQS | RERVASAREEA | LDHMVEYVAQ | NTPVTWL VGP |
| 430        |            |            |             |            |             |
| FAPGITEKAP | EEKK       |            |             |            |             |

|       |                                 |
|-------|---------------------------------|
| RBM15 | Q96T37;Q96T37-3;Q96T37-2;Q8NDT2 |
|-------|---------------------------------|

|            |           |            |             |            |            |
|------------|-----------|------------|-------------|------------|------------|
| 10         | 20        | 30         | 40          | 50         | 60         |
| MRTAGRDPVP | RRSPRWRAV | PLCETSAGRR | VTQLRGDDL R | RPATMKGKER | SPVKAKRSRG |

|            |             |            |            |            |            |
|------------|-------------|------------|------------|------------|------------|
| 70         | 80          | 90         | 100        | 110        | 120        |
| GEDSTSRGER | SKKLGSGGS   | NGSSSGKTD  | GGGSRRLHL  | DKSSSRGGS  | EYDTGGGSS  |
| 130        | 140         | 150        | 160        | 170        | 180        |
| SRLHSYSSPS | TKNSSGGGES  | RSSSRGGGE  | SRSSGAASSA | PGGGDGAAYK | TLKISELGSQ |
| 190        | 200         | 210        | 220        | 230        | 240        |
| LSDEAVEDGL | FHEFKRFGDV  | SVKISHLSGS | GSGDERVAFV | NFRRPEDARA | AKHARGRLVL |
| 250        | 260         | 270        | 280        | 290        | 300        |
| YDRPLKIEAV | YVSRRRSRSP  | LDKDTYPPSA | SVVGASVGGH | RHPPGGGGGQ | RSLSPGGAAL |
| 310        | 320         | 330        | 340        | 350        | 360        |
| GYRDYRLQQL | ALGRLP PPPP | PPLPRDLERE | RDYPFYERVR | PAYSLEPRVG | AGAGAAPFRE |
| 370        | 380         | 390        | 400        | 410        | 420        |
| VDEISPEDDQ | RANRTLFLGN  | LDITVTESDL | RRAFDRFGVI | TEVDIKRPSR | GQTSTYGFLK |
| 430        | 440         | 450        | 460        | 470        | 480        |
| FENLDMSHRA | KLAMSGKIII  | RNPIKIGYGK | ATPTTRLWVG | GLGPWVPLAA | LAREFDRFGT |
| 490        | 500         | 510        | 520        | 530        | 540        |
| IRTIDYRKGD | SWAYIQYESL  | DAAHAAWTHM | RGFPLGGPDR | RLRVDFADTE | HRYQQQYLQP |
| 550        | 560         | 570        | 580        | 590        | 600        |
| LPLTHYELVT | DAFGHRAPDP  | LRGARDRTPP | LLYRDRDRDL | YPDSDWVPPP | PPVRERSTRT |
| 610        | 620         | 630        | 640        | 650        | 660        |
| AATSVPAYEP | LDSLDRRRDG  | WSLDRDRGDR | DLPSSRDQPR | KRRLPEESGG | RHLDRSPESD |
| 670        | 680         | 690        | 700        | 710        | 720        |
| RPRKRHCAPS | PDRSPELSSS  | RDRYNSDNDR | SSRLLLERPS | PIRDRRGSLE | KSQGDKRDRK |
| 730        | 740         | 750        | 760        | 770        | 780        |
| NSASAERDRK | HRTTAPTEGK  | SPLKKEDRSD | GSAPSTSTAS | SKLKSPSQKQ | DGGTAPVASA |
| 790        | 800         | 810        | 820        | 830        | 840        |
| SPKLCLAWQG | MLLLKNSNFP  | SNMHLLQGDL | QVASSLLVEG | STGGKVAQLK | ITQRLRLDQP |
| 850        | 860         | 870        | 880        | 890        | 900        |
| KLDEVTRRIK | VAGPNGYAIL  | LAVPGSSDSR | SSSSSAASDT | ATSTQRPLRN | LVSYLKQKQA |
| 910        | 920         | 930        | 940        | 950        | 960        |
| AGVISLPGVG | NKDKENTGVL  | HAFPPCEFSQ | QFLDSPAKAL | AKSEEDYLMV | IIVRGFGFQI |
| 970        |             |            |            |            |            |
| GVRyenkkre | NLALLLL     |            |            |            |            |

| SORBS2     | O94875-10;O94875-12;O94875-4;O94875-3;O94875-5;O94875-11;O94875;O94875-7;O94875-2;O94875-8;O94875-9;O94875-6 |             |            |            |              |  |
|------------|--------------------------------------------------------------------------------------------------------------|-------------|------------|------------|--------------|--|
| 10         | 20                                                                                                           | 30          | 40         | 50         | 60           |  |
| MSYYQRPFP  | SAYSLPASLN                                                                                                   | SSIVMQHGTS  | LDSTDTYPQH | AQSLD      | GTTSS SIPLYR |  |
| 70         | 80                                                                                                           | 90          | 100        | 110        | 120          |  |
| EKRVTVIKAP | HYPGIGPVDE                                                                                                   | SGIPTAIRTT  | VDRPKDWYKT | MFKQIHMVHK | PDDDTDMYNT   |  |
| 130        | 140                                                                                                          | 150         | 160        | 170        | 180          |  |
| PYTYNAGLYN | PPYSAQSHPA                                                                                                   | AKTQTYRPLS  | KSHSDNSENA | FKDASSPVPP | PHVPPPVPPL   |  |
| 190        | 200                                                                                                          | 210         | 220        | 230        | 240          |  |
| RPRDRSSTEK | HDWDPPDRKV                                                                                                   | DTRKFRSEPR  | SIFEYEPGKS | SILQHERPAS | LYQSSIDRSL   |  |
| 250        | 260                                                                                                          | 270         | 280        | 290        | 300          |  |
| ERPMSSASMA | SDFR                                                                                                         | KRRKSE      | PAVGPPRGLG | DQSASRTSPG | RVDLPGSSTT   |  |
| 310        | 320                                                                                                          | 330         | 340        | 350        | 360          |  |
| SSPSRAKGGD | DSKICPSLCS                                                                                                   | YSGLNGNPSS  | ELDYCSTYRQ | HLDVPRDSPR | AISFKNGWQM   |  |
| 370        | 380                                                                                                          | 390         | 400        | 410        | 420          |  |
| ARQNAEIWSS | TEETVSPKIK                                                                                                   | SRSCDDLND   | DCDSFPDPKV | KSESMGSLLC | EEDSKESCPM   |  |
| 430        | 440                                                                                                          | 450         | 460        | 470        | 480          |  |
| AWGSPYVPEV | RSNGRSRIRH                                                                                                   | RSARNAPGFL  | KMYKKMHRIN | RKDLMNSEVI | CSVKSRILOQ   |  |
| 490        | 500                                                                                                          | 510         | 520        | 530        | 540          |  |
| ESEQQHKDLL | RAWSQCSTEE                                                                                                   | VPRDMVPTRI  | SEFEKLIQKS | KSMPNLGDDM | LSPVTLEPPQ   |  |
| 550        | 560                                                                                                          | 570         | 580        | 590        | 600          |  |
| NGLCPKRRFS | IEYLLLEENQ                                                                                                   | SGPPARGRRG  | CQSNALVPIH | IEVTSDEQPR | AHVEFSDSDQ   |  |
| 610        | 620                                                                                                          | 630         | 640        | 650        | 660          |  |
| DGVVSDHSDY | IHLEGSSFCS                                                                                                   | ESDFDHFST   | SSESYFGSSH | HHHHHHHHHH | RHLISSCKGR   |  |
| 670        | 680                                                                                                          | 690         | 700        | 710        | 720          |  |
| CPASYTRFTT | MLKHERARHE                                                                                                   | NTEEP RRQEM | DPGLSKLAFL | VSPVPFRRKK | NSAPKKQTEK   |  |
| 730        | 740                                                                                                          | 750         | 760        | 770        | 780          |  |
| AKCKASVFEA | LDSALKDICD                                                                                                   | QIKAEEKRGS  | LPDNSILHRL | ISELLPDVPE | RNSSLRALRR   |  |
| 790        | 800                                                                                                          | 810         | 820        | 830        | 840          |  |
| SPLHQPLHPL | PPDGAIHCPP                                                                                                   | YQND CGRMPR | SASFQDVDTA | NSSCHHQDRG | GALQDRESPR   |  |
| 850        | 860                                                                                                          | 870         | 880        | 890        | 900          |  |

SYSSTLTDMG RSAPRERRGT PEKEKLPKA VYDFKAQTSK ELSFKKGDTV YILR **KIDQNW**  
 910 920 930 940 950 960  
**YEGEHHGR**VG IFPISYVEKL TPPEKAQPAR PPPPAQPGEI GEAIKYNFN ADTNVELSLR  
 970 980 990 1000 1010 1020  
 KGDRVILLKR VDQNWYEGKI PGTNRQGIFP VSYVEVVKKN TKGAEDYPDP PIPHSYSSDR  
 1030 1040 1050 1060 1070 1080  
 IHSLSSNKPO RPVFTHENIQ GGGEPPQALY NYTPRNEDEL ELRESDVIDV MEKCCDDGWFV  
 1090 1100  
 GTSRRTKFFG TFPGNVVKRL

| STAMBPL1          | Q96FJ0;Q96FJ0-2    |                    |                       |                    |                    |
|-------------------|--------------------|--------------------|-----------------------|--------------------|--------------------|
| 10                | 20                 | 30                 | 40                    | 50                 | 60                 |
| MDQPFTVNSL        | KKLAAMPDHT         | DVSLSPPEERV        | RALSKLGCNI            | TISEDITPRR         | YFRSGVEMER         |
| 70                | 80                 | 90                 | 100                   | 110                | 120                |
| MASVYLEEGN        | LENAFVLYNK         | FITLFVEKLP         | NHRDYQQCAV            | PEKQDIMKKL         | KEIAFPRTDE         |
| 130               | 140                | 150                | 160                   | 170                | 180                |
| LKNDLLKKYN        | VEYQEYLQSK         | NKYKAEILKK         | LEHQRLIEAE            | RKRIAQMRQQ         | QLESEQFLFF         |
| 190               | 200                | 210                | 220                   | 230                | 240                |
| EDQLKKQELA        | RGQMRSQQTS         | GLSEQID            | <b>GSA LSCFSTHQNN</b> | <b>SLLNVFADQP</b>  | <b>NK</b> SDATNYAS |
| 250               | 260                | 270                | 280                   | 290                | 300                |
| <b>HSPPVNRALT</b> | <b>PAATLSAVQN</b>  | <b>LVVEGLR</b> CVV | LPEDLCHK <b>FL</b>    | <b>QLAESNTVRG</b>  | IETCGILCGK         |
| 310               | 320                | 330                | 340                   | 350                | 360                |
| <b>LTHNEFTITH</b> | <b>VIVPK</b> QSAGP | DYCDMENVEE         | LFNVQDQHD             | LTLGWIHHP          | TQTAFLLSSVD        |
| 370               | 380                | 390                | 400                   | 410                | 420                |
| LHTHCSYQLM        | LPEAIAIVCS         | PKHKDTGIFR         | <b>LTNAGMLEVS</b>     | <b>ACKK</b> KGFHPH | TKEPRLFSIC         |
| 430               |                    |                    |                       |                    |                    |
| KHVLVKDIKI        | <b>IVLCLR</b>      |                    |                       |                    |                    |

**Supplementary Figure 11: Protein sequences of post-translationally N-myristoylated proteins, including putative sites of modification.** Below are listed the sequences (isoform 1, unless indicated otherwise) of proteins bearing PTMyr sites identified in this study (please refer to Supplementary Data 4), as reported in the UniProtKB/Swiss-Prot database. The sequences of the unique peptides detected in this study by LC-MS/MS are highlighted in yellow and grey (the two colors are used as needed to allow distinction between adjacent peptides), missed cleavage sites are underlined. The sequences of the YnMyr-modified peptides detected upon **AzKTB/AzRTB**-based enrichment are highlighted in cyan. Proteins are ordered by gene names and the Uniprot accession number is reported.

**Fig. 2d**

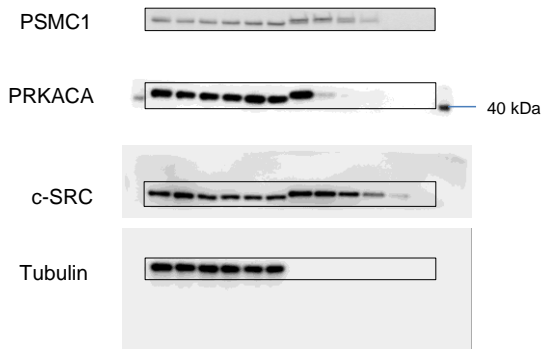

**Fig. 4a**

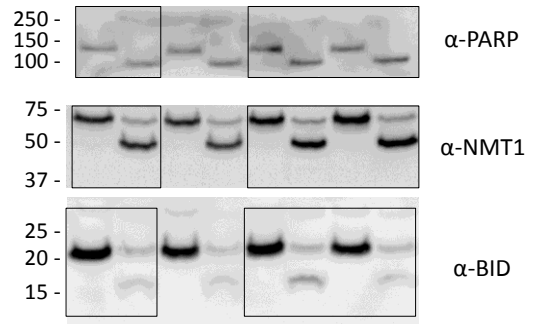

**Fig. 4c**

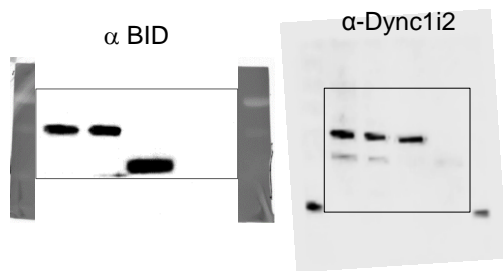

**Fig. 4d**

**Cul4B[1-590]-FLAG ( $\alpha$ -FLAG IP)**

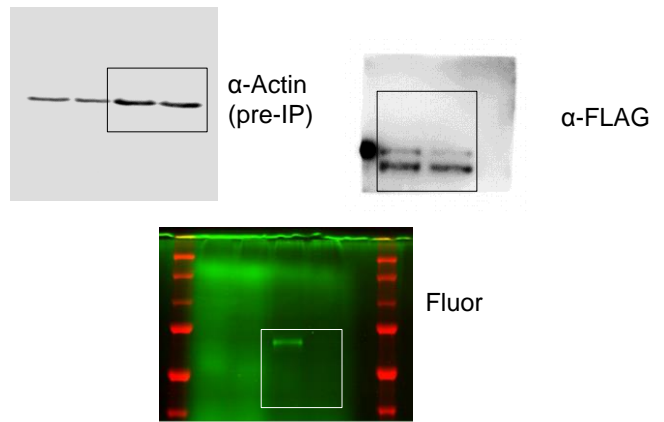

**Supplementary Fig. 1g**

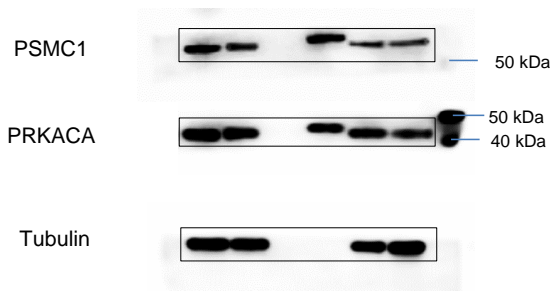

**Supplementary Fig. 5**

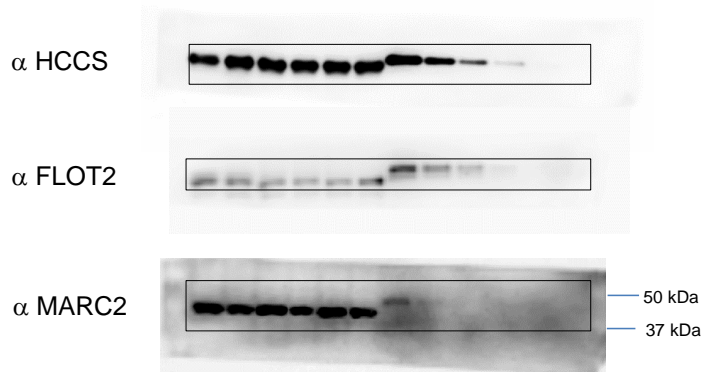

**Supplementary Figure 12: Full blots and gels relating to cropped sections shown in figures.** Only cropped blots and gels are shown; in some cases, membranes were cut between specific molecular weight markers prior to blotting to maximize information recovered from an experiment, resulting in smaller sections shown in some figures.

**Supplementary Table 1:** Previous studies of *N*-myristoylated proteins expressed in HeLa.

Proteins with an N-terminal MG motif and shown to be *N*-myristoylated in a cell-free system or *E. coli* expression system (CF), a non-native protein construct in eukaryotic cells (NN) or native proteins in eukaryotic cells (N), typically via immunoprecipitation of a radiolabeled protein. Only proteins expressed in HeLa cells are reported.<sup>3</sup> A column indicates whether proteins have been predicted to be *N*-myristoylated by online predictors (**Myr predictor (MP)**): R= Reliable; T= twilight, N= No. **Myristoylator (Myr)**: H= high probability; M= medium probability; L= low probability; N= not myristoylated). A column indicates if the protein is palmitoylated (+: found in 1 study, ++: found in 2 studies; +++: found in 3 studies; ++++: found in 4 studies;<sup>4</sup> u: reported as palmitoylated in the UniProtKB/Swiss-Prot database).

| Method | Protein name                                                                   | Gene name | Protein IDs | Reference     | Palm    | MP | Myr |
|--------|--------------------------------------------------------------------------------|-----------|-------------|---------------|---------|----|-----|
| N      | Annexin XIII                                                                   | ANXA13    | P27216      | <sup>5</sup>  |         | R  | H   |
|        | Brain acid soluble protein 1                                                   | BASP1     | P80723      | <sup>6</sup>  |         | R  | H   |
|        | Golgi-associated plant pathogenesis-related protein 1                          | GLIPR2    | Q9H4G4      | <sup>7</sup>  |         | R  | H   |
|        | MARCKS                                                                         | MARCKS    | P29966      | <sup>8</sup>  |         | R  | H   |
|        | cAMP dependent protein kinase alpha subunit                                    | PRKACA    | P17612      | <sup>9</sup>  |         | R  | H   |
|        | Tyrosine protein kinase Src                                                    | SRC       | P12931      | <sup>10</sup> | +       | R  | H   |
| NN     | ABL1                                                                           | ABL1      | P00519      | <sup>11</sup> |         | T  | N   |
|        | A-kinase anchor protein 12                                                     | AKAP12    | Q02952      | <sup>12</sup> |         | R  | H   |
|        | A-kinase anchor protein 7                                                      | AKAP7     | Q43687      | <sup>13</sup> | u       | R  | H   |
|        | ADP ribosylation factor 1                                                      | ARF1      | P84077      | <sup>14</sup> | ++      | T  | H   |
|        | ADP ribosylation factor 6                                                      | ARF6      | P62330      | <sup>15</sup> |         | R  | H   |
|        | ADP-ribosylation factor-like 5B                                                | ARL5B     | Q96KC2      | <sup>16</sup> |         | N  | M   |
|        | Cyclin-Y                                                                       | CCNY      | Q8ND76      | <sup>17</sup> | +++     | R  | H   |
|        | Coiled-coil-helix-coiled-coil-helix domain-containing protein 3, mitochondrial | CHCHD3    | Q9NX63      | <sup>18</sup> | +       | R  | H   |
|        | Charged multivesicular body protein 6                                          | CHMP6     | Q96FZ7      | <sup>19</sup> |         | N  | H   |
|        | Calcium and integrin-binding protein 1                                         | CIB1      | Q99828      | <sup>20</sup> |         | R  | H   |
|        | NADH cytochrome b5 reductase 3                                                 | CYB5R3    | P00387      | <sup>21</sup> | ++      | R  | H   |
|        | Sphingolipid delta(4)-desaturase DES1                                          | DEGS1     | O15121      | <sup>22</sup> |         | T  | H   |
|        | Dual specificity protein phosphatase 22                                        | DUSP22    | Q9NRW4      | <sup>23</sup> |         | N  | H   |
|        | Formin-like protein 1                                                          | FMNL1     | O95466      | <sup>24</sup> |         | T  | N   |
|        | Fibroblast growth factor receptor substrate 2 FRS2                             | FRS2      | Q8WU20      | <sup>25</sup> |         | R  | H   |
|        | Fibroblast growth factor receptor substrate 3 FRS3                             | FRS3      | O43559      | <sup>25</sup> |         | R  | H   |
|        | Tyrosine protein kinase Fyn                                                    | FYN       | P06241      | <sup>26</sup> | u; ++   | R  | H   |
|        | Guanine nucleotide-binding protein G(i) subunit alpha-1                        | GNAI1     | P63096      | <sup>27</sup> | u; ++   | R  | H   |
|        | Guanine nucleotide-binding protein G(i) subunit alpha-2                        | GNAI2     | P04899      | <sup>27</sup> | u; ++++ | R  | H   |
|        | Guanine nucleotide-binding protein G(k) subunit alpha                          | GNAI3     | P08754      | <sup>27</sup> | u; ++++ | R  | H   |
|        | Guanine nucleotide-binding protein G(o) subunit alpha                          | GNAO1     | P09471      | <sup>27</sup> | u; +++  | R  | H   |
|        | Guanine nucleotide-binding protein G(z) subunit alpha                          | GNAZ      | P19086      | <sup>27</sup> | u; +    | R  | H   |
|        | Neuron-specific calcium-binding protein hippocalcin                            | HPCA      | P84074      | <sup>28</sup> |         | R  | H   |
|        | Hippocalcin-like protein 1                                                     | HPCAL1    | P37235      | <sup>29</sup> |         | R  | H   |
|        | LanC-like protein 2                                                            | LANCL2    | Q9NS86      | <sup>30</sup> |         | N  | H   |
|        | Tyrosine protein kinase Lyn                                                    | LYN       | P07948      | <sup>31</sup> | u; +    | R  | H   |
|        | Mitochondrial peptide methionine sulfoxide reductase                           | MSRA      | Q9UJ68      | <sup>32</sup> |         | R  | H   |
|        | Neuronal calcium sensor 1                                                      | NCS1      | P62166      | <sup>28</sup> |         | R  | H   |
|        | Nephrocystin-3                                                                 | NPHP3     | Q7Z494      | <sup>33</sup> |         | T  | H   |
|        | cGMP-dependent 3',5'-cyclic                                                    | PDE2A     | O00408      | <sup>34</sup> | u       | N  | N   |

|                                                             |                                                                         |          |               |               |       |   |   |
|-------------------------------------------------------------|-------------------------------------------------------------------------|----------|---------------|---------------|-------|---|---|
|                                                             | phosphodiesterase                                                       |          |               |               |       |   |   |
|                                                             | Protein phosphatase 1A                                                  | PPM1A    | P35813        | <sup>35</sup> |       | N | H |
|                                                             | Protein phosphatase 1B                                                  | PPM1B    | O75688        | <sup>35</sup> |       | N | M |
|                                                             | Calcineurin B type 1                                                    | PPP3R1   | P63098        | <sup>36</sup> |       | R | H |
|                                                             | 5'-AMP-activated protein kinase subunit beta-1                          | PRKAB1   | Q9Y478        | <sup>37</sup> |       | N | N |
|                                                             | 5'-AMP-activated protein kinase subunit beta-2                          | PRKAB2   | O43741        | <sup>38</sup> |       | N | M |
|                                                             | 26S protease regulatory subunit 4                                       | PSMC1    | P62191        | <sup>39</sup> | ++    | R | H |
|                                                             | Raftlin                                                                 | RFTN1    | Q14699        | <sup>40</sup> | u     | N | H |
|                                                             | Protein-associating with the carboxyl-terminal domain of ezrin (PACE-1) | SCYL3    | Q8IZE3        | <sup>41</sup> |       | R | H |
|                                                             | TIR domain-containing adapter molecule 2                                | TICAM2   | Q86XR7        | <sup>42</sup> |       | R | M |
|                                                             | Tyrosine protein kinase Yes                                             | YES1     | P07946        | <sup>43</sup> | u; ++ | R | H |
|                                                             | E3 ubiquitin-protein ligase ZNRF2                                       | ZNRF2    | Q8NHG8        | <sup>44</sup> |       | R | M |
| CF                                                          | Apoptosis-inducing factor 2                                             | AIFM2    | Q9BRQ8        | <sup>45</sup> |       | R | H |
|                                                             | Ankyrin repeat and IBR domain-containing protein 1                      | ANKIB1   | Q9P2G1        | <sup>45</sup> |       | R | H |
|                                                             | ADP ribosylation factor-like protein 1                                  | ARL1     | P40616        | <sup>46</sup> |       | R | H |
|                                                             | BTB/POZ domain-containing protein 7                                     | BTBD7    | Q9P203        | <sup>45</sup> |       | R | M |
|                                                             | Calcineurin B homologous protein 1                                      | CHP1     | Q99653        | <sup>47</sup> |       | R | H |
|                                                             | Calcineurin B homologous protein 3                                      | CHP3     | Q96BS2        | <sup>48</sup> |       | R | H |
|                                                             | Dixin                                                                   | DIXDC1   | Q155Q3        | <sup>45</sup> |       | T | N |
|                                                             | Dymedlin                                                                | DYM      | Q7RTS9        | <sup>49</sup> |       | R | H |
|                                                             | Formin-like protein 2                                                   | FMNL2    | Q96PY5        | <sup>45</sup> |       | T | H |
|                                                             | Formin-like protein 3 (FMNL3)                                           | FMNL3    | Q8IVF7        | <sup>45</sup> |       | N | M |
|                                                             | Golgi reassembly-stacking protein 1 (GRASP65)                           | GORASP1  | Q9BQQ3        | <sup>50</sup> |       | R | H |
|                                                             | Uncharacterized protein KIAA1522                                        | KIAA1522 | Q9P206        | <sup>45</sup> |       | N | H |
|                                                             | TLD domain-containing protein KIAA1609                                  | KIAA1609 | Q6P9B6        | <sup>45</sup> |       | T | H |
|                                                             | Protein Lunapark                                                        | LNP      | Q9C0E8        | <sup>45</sup> |       | T | H |
|                                                             | E3 Ubiquitin-protein ligase MGRN1                                       | MGRN1    | O60291        | <sup>45</sup> |       | R | H |
|                                                             | NADH dehydrogenase [ubiquinone] 1 beta subcomplex subunit 7             | NDUFB7   | P17568        | <sup>51</sup> |       | N | L |
|                                                             | Phosphoinositide 3-kinase regulatory subunit 4 (PIK3R4)                 | PIK3R4   | Q99570        | <sup>52</sup> |       | T | H |
|                                                             | RING finger protein 11                                                  | RNF11    | Q9Y3C5        | <sup>45</sup> |       | N | M |
|                                                             | Serine incorporator 1                                                   | SERINC1  | Q9NRX5        | <sup>45</sup> |       | N | N |
|                                                             | Tescalin                                                                | TESC     | Q96BS2        | <sup>48</sup> |       | R | H |
| Zinc finger ZZ-type and EF-hand domain-containing protein 1 | ZZEF1                                                                   | O43149   | <sup>45</sup> |               | R     | H |   |

## Supplementary Table 2: Known post-translationally *N*-myristoylated proteins.

Proteins shown to be *N*-myristoylated in systems where proteins were overexpressed in eukaryotic cells (NN) or were present at native expression levels (N). A column indicates if the new N-terminal sequences have been predicted to be *N*-myristoylated by online predictors (**Myr predictor**: R= Reliable; T= twilight. **Myristoylator**: H= high probability; M= medium probability; L= low probability; N= not myristoylated).

| Method                      | Protein name                                               | Gene name | Protein IDs | Ref.                             | New N-terminal sequence         | Cleavage site | MP | Myr |
|-----------------------------|------------------------------------------------------------|-----------|-------------|----------------------------------|---------------------------------|---------------|----|-----|
| N                           | BH3-interacting domain death agonist                       | BID       | P55957      | 53                               | GNRSSHSRLGRIEADSE SQEDIIRNIARHL | G60           | R  | H   |
| NN                          | Actin, cytoplasmic 1 ( $\beta$ -actin)                     | ACTB      | P60709      | 54                               | GQVITIGNERFRCPEAL FQPSFLGMESCGI | G245          | T  | N   |
|                             | Cell division control protein 6 homolog                    | CDC6      | Q99741      | 55                               | GNRMTLSQEGAQDSFP LQQKILVCSMLLI  | G443          | R  | H   |
|                             | Gelsolin                                                   | GSN       | P06396      | 54                               | GLGLSYLSSHIANVERV PFDAATLHTSTAM | G404          | R  | M   |
|                             | Huntingtin                                                 | HTT       | P42858      | 55                               | GTQASSPISDSSQTTTE GPDSAVTPSDSSE | G551          | R  | H   |
|                             | Microtubule-actin cross-linking factor 1, isoforms 1/2/3/5 | MACF1     | Q9UPN3      | 55                               | GSDASQLLHQAQVAQQ EFLEVKQRVNSGCV | G5087         | R  | H   |
|                             | Induced myeloid leukemia cell differentiation protein      | MCL1      | Q07820      | 55                               | GSLPSTPPPAAAAEDEL YRQSLEIISRYLR | G158          | R  | H   |
|                             | p21-activated protein kinase-2                             | PAK2      | Q13177      | 56                               | GAAKSLDKQKKTKMT DEEIMEKLRITVSI  | G213          | T  | H   |
| YTH domain family protein 2 | YTHDF2                                                     | Q9Y5A9    | 55          | GNGVGQSQAGSGSTP SEPHPVLEKLRISINN | G367                            | R             | M  |     |



## Supplementary Methods

### 1.1. General methods: Synthetic procedures

All reagents and solvents were purchased from Sigma-Aldrich, NovaBiochem UK or AGTC Bioproducts and used without further purification. Ultrapure water was obtained from MilliQ® Millipore water purification system. Moisture sensitive reactions were performed under nitrogen atmosphere using dried glassware and standard syringe/septa techniques.

Thin Layer Chromatography was performed on Merck pre-coated Silica plates (Aluminum oxide 60 F254, Merck). Spots were visualized by UV light (operating at 254 nm), and using the appropriate stain. Silica gel column chromatography was carried either by hand-made columns with Merck Silica 60Å, or using an Isolera (Biotage, UK) automated apparatus with fraction collector equipped with SNAP cartridges columns (Biotage, UK).

NMR spectra were recorded on 400MHz Bruker instruments and were referenced to residual solvent signals. Data are presented as follows: chemical shift, multiplicity (s = singlet, d = doublet, t = triplet, m = multiplet), coupling constant(s) in Hz and integration. High resolution mass spectrometry (HRMS) was performed on Waters LCT Premier Spectrometer.

Analytical and semi-preparative RP-HPLC was carried out on a Waters 2767 system equipped with a photodiode array, a mass spectrometer and an X-Bridge C18 column (5 μM, 4.6 mM × 100 mM). The flow rate of 1.2 mL/min was used for the analytical mode and 20 mL/min were used for the preparative mode.

Freeze-drying was carried out using a freeze dryer Alpha 2-4 LD plus, Christ (Germany).

The syntheses of the peptide c-Src (N-terminal 8 amino acids from Gly2), Azidopropionic acid, the capture reagent AzTB (azido-tamra-biotin), the capture reagent AzKTB (azido-lysine-tamra-biotin) and inhibitor **1** have been described elsewhere.<sup>1, 2, 57, 58</sup>

### 1.2. Synthetic procedures

#### 1.2.1. YnMyr synthesis

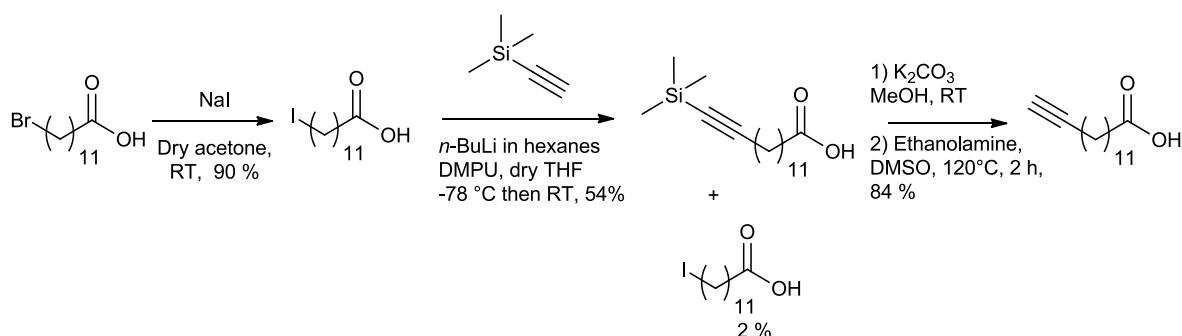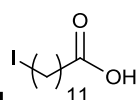

#### 12-Iodododecanoic acid

To a solution of 12-bromododecanoic acid (1.00 g, 3.58 mmol, 1 eq) in dry acetone (20 mL) was added NaI (1.61 g, 10.74 mmol, 3eq) in one portion. The mixture was stirred at room temperature overnight. Completion of the reaction was checked by <sup>1</sup>H NMR. Water (200 mL) and DCM (100 mL) were added. The layers were separated and the aqueous layer was extracted with DCM (2 x 70 mL). The combined organic layers were washed with saturated aqueous sodium thiosulfate (100 mL), brine (100 mL), dried over MgSO<sub>4</sub> and concentrated under reduced pressure to yield a white solid (1.05 g,

90%). The crude product was used without further purification for the next reaction.  $^1\text{H NMR}$  (400 MHz,  $\text{CDCl}_3$ )  $\delta$  = 3.17 (t,  $J=7.1$ , 2H), 2.33 (t,  $J=7.5$ , 2H), 1.84 – 1.75 (m, 2H), 1.60 (m, 2H), 1.27 (m, 14H).

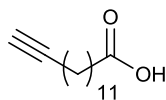

### Tetradec-13-ynoic acid (YnMyr)

Under nitrogen atmosphere, a solution of TMS-acetylene (1.12 mL, 7.82 mmol, 2.5 eq) in dry THF (8 mL) was cooled down to  $-78\text{ }^\circ\text{C}$  using a bath of acetone and dry ice. A solution of *n*-BuLi in hexanes (3.8 mL, 2.5 M solution, 9.39 mmol, 3.0 eq) was added drop wise. The clear reaction mixture was allowed to warm to room temperature for 10 minutes and then cooled to  $-78\text{ }^\circ\text{C}$ . DMPU (7.9 mL, 21 eq) and a solution of 12-iodododecanoic acid (1.02 g, 3.13 mmol, 1.0 eq) in dry THF (8 mL) were added drop wise. The yellow reaction mixture was allowed to warm to room temperature and stirred overnight. The reaction mixture was cooled to  $-78\text{ }^\circ\text{C}$  and quenched by the drop wise addition of saturated  $\text{NH}_4\text{Cl}$  (240 mL).  $\text{Et}_2\text{O}$  (100 mL) and water (50 mL) were added to the brown solution. The layers were separated and the aqueous layer was extracted with  $\text{Et}_2\text{O}$  (2 x 50 mL). The combined organic layers were washed with water (100 mL), brine (100 mL), dried over  $\text{Na}_2\text{SO}_4$ , filtered and concentrated under reduced pressure. The brown residue was purified by silica-gel chromatography (gradient:  $\text{EtOAc}:\text{AcOH}$  99:0:1 to 95:4:1) to yield a white solid (500 mg, 54%). NMR analysis of the product showed that the product contained < 2% of 12-iodododecanoic acid.

To a suspension of TMS-protected alkyne (490 mg, 1 eq, 1.65 mmol) in MeOH (10 mL) was added  $\text{K}_2\text{CO}_3$  (457 mg, 3.31 mmol, 2 eq). The reaction mixture was stirred at room temperature overnight to give a clear reaction mixture. The mixture was concentrated under reduced pressure. The residue was taken up in 2N HCl (50 mL) and  $\text{Et}_2\text{O}$  (50 mL). The layers were separated and the aqueous layer was extracted with  $\text{Et}_2\text{O}$  (2 x 50 mL). The combined organic layers were washed with water (50 mL), brine (50 mL), dried over  $\text{Na}_2\text{SO}_4$ , filtered and concentrated under reduced pressure to yield an off-white solid (359 mg, 96%). NMR analysis of the product showed that the product contained < 2% of 12-iodododecanoic acid.

The white solid (YnMyr + impurity (< 2%; 12-iodododecanoic acid); 340 mg, 1.52 mmol) was dissolved in DMSO (500  $\mu\text{L}$ ) and ethanolamine (25 eq regarding 2% impurity, 0.76 mmol, 46  $\mu\text{L}$ ) was added in one portion. The reaction mixture was heated to  $120\text{ }^\circ\text{C}$  for 2 h and then allowed to cool down to room temperature.  $\text{Et}_2\text{O}$  (100 mL) and 2N HCl (100 mL) were added. The layers were separated and the aqueous layer was extracted with  $\text{Et}_2\text{O}$  (50 mL). The combined organic layers were washed with 0.5 HCl (50 mL), brine (50 mL), dried over  $\text{MgSO}_4$  and concentrated under reduced pressure to yield a white solid (296 mg, 84%; overall yield = 37%).  $^1\text{H NMR}$  (400 MHz,  $\text{CDCl}_3$ )  $\delta$  2.33 (t,  $J = 7.5$ , 2H,  $\text{CH}_2\text{CO}_2\text{H}$ ), 2.16 (dt,  $J = 2.6, 7.1$ , 2H,  $\text{CH}_2\text{C}\equiv\text{CH}$ ), 1.92 (t,  $J = 2.6$ , 1H,  $\text{C}\equiv\text{CH}$ ), 1.65 – 1.55 (m, 2H,  $\text{CH}_2\text{CH}_2\text{CO}_2\text{H}$ ), 1.54 – 1.45 (m, 2H,  $\text{CH}_2\text{CH}_2\text{C}\equiv\text{CH}$ ), 1.41 – 1.19 (m, 14H,  $7\times\text{CH}_2$ );  $^{13}\text{C NMR}$  (101 MHz,  $\text{CDCl}_3$ )  $\delta$  179.69 (C=O), 85.03 ( $\text{C}\equiv\text{CH}$ ), 68.02 ( $\text{C}\equiv\text{CH}$ ), 34.14, 29.5, 29.45, 29.40, 29.2, 29.1, 29.0, 28.7, 28.5, 24.87, 18.60; **HRMS** (ESI, negative mode) found 223.1698 ( $[\text{M} - \text{H}]^-$  requires 223.1699).

### 1.2.2. YnMyrCoA synthesis

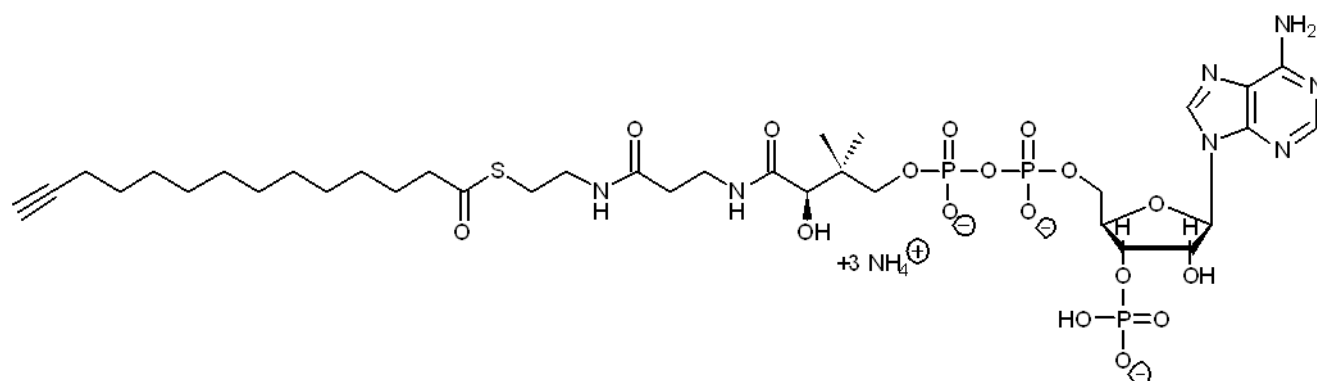

To a suspension of tetradec-13-ynoic acid (YnMyr, 14.8 mg, 65  $\mu\text{mol}$ , 2 eq) in dry THF (1.0 mL) was added a solution of 1,1'-carbonyl-diimidazole (12.7 mg, 78  $\mu\text{mol}$ , 2.4 eq) in DCM (1.0 mL), under nitrogen atmosphere. The clear reaction mixture was stirred for 45 min at room temperature. The reaction mixture was concentrated under reduced pressure. The yellow residue was dissolved in dry THF (1.0 mL). Co-enzyme A hydrate from yeast (25 mg, 32  $\mu\text{mol}$ , 1 eq) was dissolved in an aqueous solution of  $\text{NaHCO}_3$  (0.5 M, 3.4 mL) and added to the solution of activated acid. The reaction mixture was stirred at room temperature for 3 h under nitrogen atmosphere. THF was removed under reduced pressure. The product was precipitated by adding 20% perchloric acid drop wise (1 mL). The white solid was pelleted by centrifugation and washed with 1% perchloric acid and acetone. The product was purified by semi preparative LC-MS over a gradient of MeOH in 25 mM ammonium bicarbonate pH 8 (50-98 %, 20 min), YnMyrCoA was obtained as a white lyophilized solid (22.2 mg, 66% yield). Analysis was consistent with NMR and MS analysis reported in the literature.<sup>59</sup>

### 1.2.3. MyrCoA synthesis

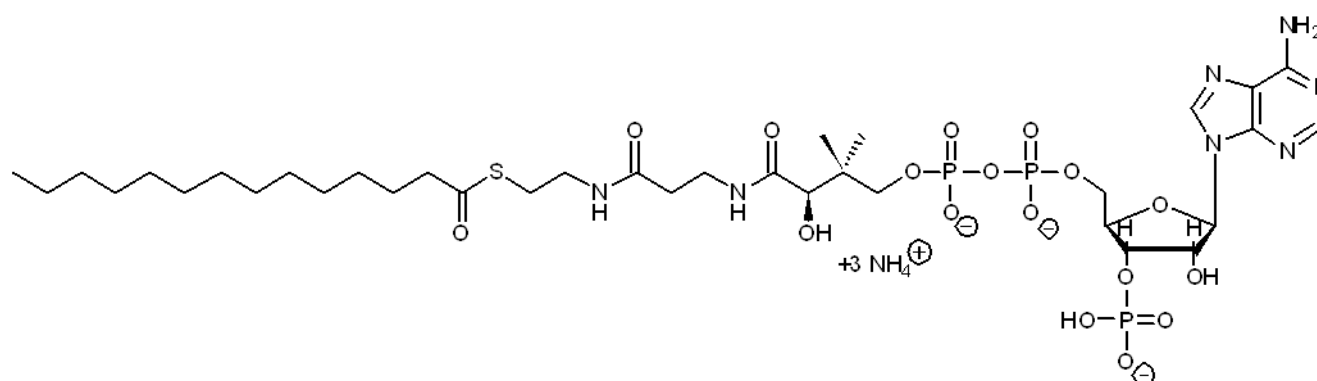

A similar procedure as YnMyrCoA was used to prepare MyrCoA. MyrCoA was obtained as a white lyophilized solid (10 mg, 32% yield). Analysis was consistent with NMR and MS analysis reported in the literature.<sup>59</sup>

### 1.2.4. Capture reagents: AzKTB and AzRTB

Biotin-PEG Novatag™ resin (0.47 mmol/g loading, 106.4 mg, 50.0  $\mu\text{mol}$ , 1 eq) was swollen in DMF (2 mL, 30 min), Fmoc deprotected with 20% v/v piperidine in DMF (2 mL, 10 min  $\times$  3) and washed with DMF, DCM and DMF sequentially. Fmoc-Lysine(Mmt)-OH (96.1 mg, 3 eq), HATU (57 mg, 3 eq) and DIPEA (52.3  $\mu\text{L}$ , 6 eq) were dissolved in DMF (1 mL), added to the deprotected resin and the reaction was shaken for 2h after which the procedure was repeated. All subsequent couplings, i.e. Fmoc-6-Ahx-OH, Fmoc-Gly-OH, Fmoc-Lys(Boc)-OH (Az-KTB) or Fmoc-Arg(Pbf)-OH (Az-RTB), Fmoc-Ala-OH,

and Azidopropionic acid (all 5 eq) were performed using DIC/HOBt activation (5 eq each, 30 min x 2). Following the removal of Mmt protecting group with 1 % TFA in DCM (10 min x 4) and wash (DCM, DMF), TAMRA (43 mg, 2 eq) was activated for 10 min in DMF (1 mL) with DIC (15.7 mg, 2 eq) and HOAt (13.6 mg, 2 eq) and coupled to the peptidyl resin (2 h x 2). The crude product was then cleaved from the resin with 95 % TFA, 2.5 % water and 2.5 % triisopropylsilane (3 h) and precipitated with cold TBME. The solids were pelleted by centrifugation (15 min, 4300 rpm, 4 °C) and washed three times with TBME. The pelleted product was dried and purified by semi preparative LC-MS over a gradient of MeOH (0.1% FA) in water (0.1% FA) (2-98 %, 15 min), with detection over 100–600 nm. The product was obtained by lyophilisation as a bright pink amorphous solid (Az-KTB: 12 mg, 17 % yield; Az-RTB: 15 mg, 20 %). HRMS m/z (ESI), calculated for Az-KTB, C<sub>71</sub>H<sub>104</sub>N<sub>16</sub>O<sub>15</sub>S ([M + 2H]<sup>2+</sup>) 727.3873, found 727.3892; calculated for Az-RTB, C<sub>71</sub>H<sub>104</sub>N<sub>18</sub>O<sub>15</sub>S ([M + 2H]<sup>2+</sup>) 741.3904, found 741.3847.

## Supplementary References

1. Goncalves, V. et al. A fluorescence-based assay for N-myristoyltransferase activity. *Analytical Biochemistry* **421**, 342-344 (2012).
2. Heal, W.P., Wright, M.H., Thinon, E. & Tate, E.W. Multifunctional protein labeling via enzymatic N-terminal tagging and elaboration by click chemistry. *Nat. Protocols* **7**, 105-117 (2012).
3. Nagaraj, N. et al. Deep proteome and transcriptome mapping of a human cancer cell line. *Molecular Systems Biology* **7** (2011).
4. Wilson, J.P., Raghavan, A.S., Yang, Y.-Y., Charron, G. & Hang, H.C. Proteomic Analysis of Fatty-acylated Proteins in Mammalian Cells with Chemical Reporters Reveals S-Acylation of Histone H3 Variants. *Molecular & Cellular Proteomics* **10** (2011).
5. Wice, B.M. & Gordon, J.I. A strategy for isolation of cDNAs encoding proteins affecting human intestinal epithelial cell growth and differentiation: characterization of a novel gut-specific N-myristoylated annexin. *The Journal of Cell Biology* **116**, 405-422 (1992).
6. Mosevitsky, M.I. et al. The BASP1 family of myristoylated proteins abundant in axonal termini. Primary structure analysis and physico-chemical properties. *Biochimie* **79**, 373-384 (1997).
7. Eberle, H.B. et al. Identification and characterization of a novel human plant pathogenesis-related protein that localizes to lipid-enriched microdomains in the Golgi complex. *Journal of Cell Science* **115**, 827-838 (2002).
8. McIlhinney, R.A. & McGlone, K. Evidence for a non-myristoylated pool of the 80 kDa protein kinase C substrate of rat brain. *Biochemical Journal* **271**, 681-685 (1990).
9. Carr, S.A., Biemann, K., Shoji, S., Parmelee, D.C. & Titani, K. n-Tetradecanoyl is the NH<sub>2</sub>-terminal blocking group of the catalytic subunit of cyclic AMP-dependent protein kinase from bovine cardiac muscle. *Proceedings of the National Academy of Sciences* **79**, 6128-6131 (1982).
10. Buss, J.E. & Sefton, B.M. Myristic acid, a rare fatty acid, is the lipid attached to the transforming protein of Rous sarcoma virus and its cellular homolog. *Journal of Virology* **53**, 7-12 (1985).
11. Jackson, P. & Baltimore, D. N-terminal mutations activate the leukemogenic potential of the myristoylated form of c-abl. *EMBO Journal* **8**, 449-456 (1989).
12. Streb, J.W., Kitchen, C.M., Gelman, I.H. & Miano, J.M. Multiple Promoters Direct Expression of Three AKAP12 Isoforms with Distinct Subcellular and Tissue Distribution Profiles. *Journal of Biological Chemistry* **279**, 56014-56023 (2004).
13. Fraser, I.D.C. et al. A novel lipid-anchored A-kinase Anchoring Protein facilitates cAMP-responsive membrane events. *EMBO Journal* **17**, 2261-2272 (1998).
14. Kahn, R.A., Goddard, C. & Newkirk, M. Chemical and immunological characterization of the 21-kDa ADP-ribosylation factor of adenylate cyclase. *Journal of Biological Chemistry* **263**, 8282-8287 (1988).
15. D'Souza-Schorey, C. & Stahl, P.D. Myristoylation is required for the intracellular localization and endocytic function of ARF6. *Experimental Cell Research* **221**, 153-159 (1995).
16. Lin, C.-Y., Li, C.-C., Huang, P.-H. & Lee, F.-J.S. A developmentally regulated ARF-like 5 protein (ARL5), localized to nuclei and nucleoli, interacts with heterochromatin protein 1. *Journal of Cell Science* **115**, 4433-4445 (2002).
17. Jiang, M., Gao, Y., Yang, T., Zhu, X. & Chen, J. Cyclin Y, a novel membrane-associated cyclin, interacts with PFTK1. *FEBS Letters* **583**, 2171-2178 (2009).

18. Darshi, M. et al. ChChd3, an inner mitochondrial membrane protein, is essential for maintaining crista integrity and mitochondrial function. *Journal of Biological Chemistry* **286**, 2918-2932 (2011).
19. Yorikawa, C. et al. Human CHMP6, a myristoylated ESCRT-III protein, interacts directly with an ESCRT-II component EAP20 and regulates endosomal cargo sorting. *Biochemical Journal* **387**, 17-26 (2005).
20. Stabler, S.M., Ostrowski, L.L., Janicki, S.M. & Monteiro, M.J. A Myristoylated Calcium-binding Protein that Preferentially Interacts with the Alzheimer's Disease Presenilin 2 Protein. *The Journal of Cell Biology* **145**, 1277-1292 (1999).
21. Borgese, N., Aggujaro, D., Carrera, P., Pietrini, G. & Bassetti, M. A role for N-myristoylation in protein targeting: NADH-cytochrome b5 reductase requires myristic acid for association with outer mitochondrial but not ER membranes. *The Journal of Cell Biology* **135**, 1501-1513 (1996).
22. Beauchamp, E. et al. Myristic acid increases the activity of dihydroceramide  $\Delta$ 4-desaturase 1 through its N-terminal myristoylation. *Biochimie* **89**, 1553-1561 (2007).
23. Schwertassek, U. et al. Myristoylation of the dual-specificity phosphatase c-JUN N-terminal kinase (JNK) stimulatory phosphatase 1 is necessary for its activation of JNK signaling and apoptosis. *FEBS Journal* **277**, 2463-2473 (2010).
24. Han, Y. et al. Formin-like 1 (FMNL1) Is Regulated by N-terminal Myristoylation and Induces Polarized Membrane Blebbing. *Journal of Biological Chemistry* **284**, 33409-33417 (2009).
25. Xu, H., Lee, K.W. & Goldfarb, M. Novel Recognition Motif on Fibroblast Growth Factor Receptor Mediates Direct Association and Activation of SNT Adapter Proteins. *Journal of Biological Chemistry* **273**, 17987-17990 (1998).
26. Peters, D.J., McGrew, B.R., Perron, D.C., Liptak, L.M. & Laudano, A.P. In vivo phosphorylation and membrane association of the fyn proto-oncogene product in IM-9 human lymphoblasts. *Oncogene* **5**, 1313-1319 (1990).
27. Mumby, S.M., Heukeroth, R.O., Gordon, J.I. & Gilman, A.G. G-protein alpha-subunit expression, myristoylation, and membrane association in COS cells. *Proceedings of the National Academy of Sciences* **87**, 728-732 (1990).
28. O'Callaghan, D.W. et al. Differential Use of Myristoyl Groups on Neuronal Calcium Sensor Proteins as a Determinant of Spatio-temporal Aspects of Ca<sup>2+</sup> Signal Transduction. *Journal of Biological Chemistry* **277**, 14227-14237 (2002).
29. Spilker, C. et al. The neuronal EF-hand calcium-binding protein visinin-like protein-3 is expressed in cerebellar Purkinje cells and shows a calcium-dependent membrane association. *Neuroscience* **96**, 121-129 (2000).
30. Landlinger, C., Salzer, U. & Prohaska, R. Myristoylation of human LanC-like Protein 2 (LANCL2) is essential for the interaction with the plasma membrane and the increase in cellular sensitivity to adriamycin. *Biochimica et Biophysica Acta (BBA) - Biomembranes* **1758**, 1759-1767 (2006).
31. Kovářová, M. et al. Structure-Function Analysis of Lyn Kinase Association with Lipid Rafts and Initiation of Early Signaling Events after Fc $\epsilon$  Receptor I Aggregation. *Molecular and Cellular Biology* **21**, 8318-8328 (2001).
32. Kim, G., Cole, N.B., Lim, J.C., Zhao, H. & Levine, R.L. Dual Sites of Protein Initiation Control the Localization and Myristoylation of Methionine Sulfoxide Reductase A. *Journal of Biological Chemistry* **285**, 18085-18094 (2010).
33. Wright, K.J. et al. An ARL3-UNC119-RP2 GTPase cycle targets myristoylated NPHP3 to the primary cilium. *Genes & Development* **25**, 2347-2360 (2011).
34. Russwurm, C., Zoidl, G., Koesling, D. & Russwurm, M. Dual Acylation of PDE2A Splice Variant 3: TARGETING TO SYNAPTIC MEMBRANES. *Journal of Biological Chemistry* **284**, 25782-25790 (2009).
35. Chida, T. et al. N-Myristoylation is essential for protein phosphatases PPM1A and PPM1B to dephosphorylate their physiological substrates in cells. *Biochemical Journal* **449**, 741-749 (2013).
36. Aitken, A. et al. Identification of the NH<sub>2</sub>-terminal blocking group of calcineurin B as myristic acid. *FEBS Letters* **150**, 314-318 (1982).
37. Mitchelhill, K.I. et al. Posttranslational modifications of the 5'-AMP-activated protein kinase beta1 subunit. *Journal of Biological Chemistry* **272**, 24475-24479 (1997).
38. Oakhill, J.S. et al. beta-Subunit myristoylation is the gatekeeper for initiating metabolic stress sensing by AMP-activated protein kinase (AMPK). *Proceedings of the National Academy of Sciences of the United States of America* **107**, 19237-19241 (2010).

39. Wang, X. et al. Mass spectrometric characterization of the affinity-purified human 26S proteasome complex. *Biochemistry* **46**, 3553-3565 (2007).
40. Saeki, K., Miura, Y., Aki, D., Kurosaki, T. & Yoshimura, A. The B cell-specific major raft protein, Raftlin, is necessary for the integrity of lipid raft and BCR signal transduction. *EMBO Journal* **22**, 3015-3026 (2003).
41. Sullivan, A., Uff, C.R., Isacke, C.M. & Thorne, R.F. PACE-1, a novel protein that interacts with the C-terminal domain of ezrin. *Experimental Cell Research* **284**, 222-236 (2003).
42. Rowe, D.C. et al. The myristoylation of TRIF-related adaptor molecule is essential for Toll-like receptor 4 signal transduction. *Proceedings of the National Academy of Sciences* **103**, 6299-6304 (2006).
43. Martin, D.D.O. et al. Rapid detection, discovery, and identification of post-translationally myristoylated proteins during apoptosis using a bio-orthogonal azidomyristate analog. *The FASEB Journal* **22**, 797-806 (2008).
44. Hoxhaj, G. et al. ZNRF2 is released from membranes by growth factors and, together with ZNRF1, regulates the Na<sup>+</sup>/K<sup>+</sup>-ATPase. *Journal of Cell Science* **125**, 4662-4675 (2012).
45. Suzuki, T. et al. Strategy for comprehensive identification of human N-myristoylated proteins using an insect cell-free protein synthesis system. *Proteomics* **10**, 1780-1793 (2010).
46. Lee, F.-J.S. et al. Characterization of an ADP-ribosylation Factor-like 1 Protein in *Saccharomyces cerevisiae*. *Journal of Biological Chemistry* **272**, 30998-31005 (1997).
47. Barroso, M.R. et al. A Novel Ca-binding Protein, p22, Is Required for Constitutive Membrane Traffic. *Journal of Biological Chemistry* **271**, 10183-10187 (1996).
48. Gutierrez-Ford, C. et al. Characterization of tescalcin, a novel EF-hand protein with a single Ca<sup>2+</sup>-binding site: metal-binding properties, localization in tissues and cells, and effect on calcineurin. *Biochemistry* **42**, 14553-14565 (2003).
49. Dimitrov, A. et al. The gene responsible for Dyggve-Melchior-Clausen syndrome encodes a novel peripheral membrane protein dynamically associated with the Golgi apparatus. *Human Molecular Genetics* **18**, 440-453 (2009).
50. Barr, F.A., Puype, M., Vandekerckhove, J. & Warren, G. GRASP65, a Protein Involved in the Stacking of Golgi Cisternae. *Cell* **91**, 253-262 (1997).
51. Walker, J.E. et al. Sequences of 20 subunits of NADH: Ubiquinone oxidoreductase from bovine heart mitochondria: Application of a novel strategy for sequencing proteins using the polymerase chain reaction. *Journal of Molecular Biology* **226**, 1051-1072 (1992).
52. Panaretou, C., Domin, J., Cockcroft, S. & Waterfield, M.D. Characterization of p150, an Adaptor Protein for the Human Phosphatidylinositol (PtdIns) 3-Kinase: SUBSTRATE PRESENTATION BY PHOSPHATIDYLINOSITOL TRANSFER PROTEIN TO THE p150;PtdIns 3-KINASE COMPLEX. *Journal of Biological Chemistry* **272**, 2477-2485 (1997).
53. Zha, J., Weiler, S., Oh, K.J., Wei, M.C. & Korsmeyer, S.J. Posttranslational N-myristoylation of BID as a molecular switch for targeting mitochondria and apoptosis. *Science* **290**, 1761-1765 (2000).
54. Utsumi, T., Sakurai, N., Nakano, K. & Ishisaka, R. C-terminal 15 kDa fragment of cytoskeletal actin is posttranslationally N-myristoylated upon caspase-mediated cleavage and targeted to mitochondria. *FEBS Lett* **539**, 37-44 (2003).
55. Martin, D.D. et al. Tandem reporter assay for myristoylated proteins post-translationally (TRAMPP) identifies novel substrates for post-translational myristoylation: PKCepsilon, a case study. *FASEB J* **26**, 13-28 (2012).
56. Vilas, G.L. et al. Posttranslational myristoylation of caspase-activated p21-activated protein kinase 2 (PAK2) potentiates late apoptotic events. *Proc Natl Acad Sci U S A* **103**, 6542-6547 (2006).
57. Srinivasan, R. et al. High-throughput synthesis of azide libraries suitable for direct "click" chemistry and in situ screening. *Org. Biomol. Chem.* **7**, 1821-1828 (2009).
58. Wright, M.H. et al. Validation of N-myristoyltransferase as an antimalarial drug target using an integrated chemical biology approach. *Nature Chem.* **6**, 112-121 (2014).
59. Heal, W.P., Wickramasinghe, S.R., Leatherbarrow, R.J. & Tate, E.W. N-Myristoyl transferase-mediated protein labelling in vivo. *Organic & Biomolecular Chemistry* **6**, 2308-2315 (2008).
